# Supplementary material for: Structure and optoelectronic properties of helical pyridine–furan, pyridine–pyrrole and pyridine–thiophene oligomers
Source: Royal Society of Chemistry journal article supplement (doi:10.1039/c5cp02872h), 2015-01-01
Supplement: c5cp02872h1.pdf [file c5cp02872h1.pdf]

## Supporting Information

### Structure and optoelectronic properties of helical pyridine-furan, pyridine-pyrrole and pyridine-thiophene oligomers

Harikrishna Sahu, Shashwat Gupta, Priyank Gaur, and Aditya N. Panda

## LIST OF FIGURES

|     |                                                                                                                                                                                                                                                                                                                                                                                    |    |
|-----|------------------------------------------------------------------------------------------------------------------------------------------------------------------------------------------------------------------------------------------------------------------------------------------------------------------------------------------------------------------------------------|----|
| S1  | Differences in energies ( $\Delta E$ ) between the two possible conformations (i.e., $E_i - E_{ii}$ ) of monomers calculated using B3LYP, CAM-B3LYP, B3LYP-D3 and M06-2X functionals in combination with 6-31G(d) basis set. Structures of conformations <b>i</b> and <b>ii</b> for (PF) <sub>1</sub> are shown in Fig. 2. ....                                                    | 6  |
| S2  | Relaxed potential energy curves along $\angle 1-2-3-4$ , for (PF) <sub>1</sub> (a), (PP) <sub>1</sub> (b) and (PT) <sub>1</sub> (c). Energies are relative to the energy of the most stable structure in each case. ....                                                                                                                                                           | 7  |
| S3  | Optimized structures of conformers <b>C</b> and <b>D</b> of (PF) <sub>2</sub> calculated at B3LYP-D3/6-31G(d) level. ....                                                                                                                                                                                                                                                          | 8  |
| S4  | Energies of different conformations of (PF) <sub>2</sub> , (PP) <sub>2</sub> and (PT) <sub>2</sub> with respect to that of <b>A</b> calculated at B3LYP-D3/6-31G(d) level. ....                                                                                                                                                                                                    | 9  |
| S5  | Stabilization energies of the studied compounds at the B3LYP/6-31G(d) level. $S_{nb} = [E_n - n \times E_1] - [(n-1)(E_2 - 2 \times E_1)]$ (a) and $s_{nb} = (E_n - E_{n-1}) - (E_2 - E_1)$ (b) are plotted versus $n > 1$ . Here, $n$ and $E_n$ are the number of repeating units and ground state energy of an oligomer having $n$ number of repeating units, respectively. .... | 10 |
| S6  | Optimized structures of <b>B</b> -(PP) <sub>3</sub> (a), <b>B</b> -(PP) <sub>10</sub> (b) and <b>A</b> -(PP) <sub>16</sub> (c) obtained at B3LYP-D3/6-31G(d) level. ....                                                                                                                                                                                                           | 11 |
| S7  | Optimized structures of <b>B</b> -(PT) <sub>4</sub> (a), <b>B</b> -(PT) <sub>10</sub> (b) and <b>A</b> -(PT) <sub>10</sub> (c) obtained at B3LYP-D3/6-31G(d) level. ....                                                                                                                                                                                                           | 12 |
| S8  | Bond length alternation ( $\Delta r$ ) values calculated as $(\frac{r_a+r_c+r_e}{3} - \frac{r_b+r_d}{2})/n$ . Here, $r_x$ is bond length of the $x$ bond in each repeating unit of an oligomer. These bonds are shown in Fig 1. ....                                                                                                                                               | 13 |
| S9  | Optimized structures of <b>A</b> -(PT) <sub>8</sub> obtained at B3LYP-D3/6-31G(d) level. ....                                                                                                                                                                                                                                                                                      | 14 |
| S10 | Energies of HOMO and LUMO for all the studied compounds calculated at B3LYP-D3/6-31G(d) level. $E_H$ and $E_L$ represent energies of HOMO and LUMO, respectively. $n$ stands for the number of repeating units. $u$ values of <b>A</b> -PF, <b>B</b> -PF, <b>A</b> -PP, <b>B</b> -PP, <b>A</b> -PT and <b>B</b> -PT oligomers are 23, 3, 15, 3, 8 and 4, respectively. ....        | 15 |
| S11 | HOMO and LUMO of <b>B</b> -(PF) <sub>10</sub> at an isosurface value of 0.02. ....                                                                                                                                                                                                                                                                                                 | 16 |

|     |                                                                                                                                                                                                    |    |
|-----|----------------------------------------------------------------------------------------------------------------------------------------------------------------------------------------------------|----|
| S12 | Frontier molecular orbitals of <b>A</b> -(PP) <sub>16</sub> , <b>B</b> -(PP) <sub>10</sub> , <b>A</b> -(PT) <sub>10</sub> and <b>B</b> -(PT) <sub>10</sub><br>at an isosurface value of 0.02. .... | 17 |
| S13 | CD spectra vs oligomer chain length of <b>A</b> -(PT). ....                                                                                                                                        | 18 |

## LIST OF TABLES

|     |                                                                                                                                                                                                                                                                                                                                                       |    |
|-----|-------------------------------------------------------------------------------------------------------------------------------------------------------------------------------------------------------------------------------------------------------------------------------------------------------------------------------------------------------|----|
| S1  | Differences in energies between the two possible conformations (i.e., $E_i - E_{ii}$ ) of monomers calculated using B3LYP, CAM-B3LYP, B3LYP-D3 and M06-2X functionals in combination with 6-31G(d) basis set. Values are in kcal/mol. . .                                                                                                             | 19 |
| S2  | Energies of different conformations of (PF) <sub>2</sub> , (PP) <sub>2</sub> and (PT) <sub>2</sub> with respect to that of <b>A</b> calculated at B3LYP-D3/6-31G(d) level. Values are in kcal/mol.                                                                                                                                                    | 19 |
| S3  | The expectation values of the total spin, $\langle S^2 \rangle$ , before annihilation (ba) and after annihilation (aa) of the studied molecules. . . . .                                                                                                                                                                                              | 20 |
| S4  | Electronic transition data obtained by TDDFT method for <b>A</b> -(PP) <sub>n</sub> and <b>B</b> -(PP) <sub>n</sub> at B3LYP-D3/6-31G(d) level. $E_g$ , $f_{osc}$ , H and L denote excitation energy, oscillator strength, HOMO and LUMO, respectively. Electronic transitions are from S <sub>0</sub> to S <sub>m</sub> . $E_g$ s are in eV. . . . . | 21 |
| S5  | Electronic transition data obtained by TDDFT method for <b>A</b> -(PT) <sub>n</sub> and <b>B</b> -(PT) <sub>n</sub> at B3LYP-D3/6-31G(d) level. $E_g$ , $f_{osc}$ , H and L denote excitation energy, oscillator strength, HOMO and LUMO, respectively. Electronic transitions are from S <sub>0</sub> to S <sub>m</sub> . $E_g$ s are in eV. . . . . | 22 |
| S6  | xyz coordinates of the optimized structure of <b>A</b> -(PF) <sub>10</sub> obtained at B3LYP-D3/6-31G(d) level. . . . .                                                                                                                                                                                                                               | 23 |
| S7  | xyz coordinates of the optimized structure of <b>A</b> -(PF) <sub>24</sub> obtained at B3LYP/3-21G level. . . . .                                                                                                                                                                                                                                     | 29 |
| S8  | xyz coordinates of the optimized structure of <b>B</b> -(PF) <sub>10</sub> obtained at B3LYP-D3/6-31G(d) level. . . . .                                                                                                                                                                                                                               | 42 |
| S9  | xyz coordinates of the optimized structure of <b>A</b> -(PP) <sub>10</sub> obtained at B3LYP-D3/6-31G(d) level. . . . .                                                                                                                                                                                                                               | 48 |
| S10 | xyz coordinates of the optimized structure of <b>A</b> -(PP) <sub>16</sub> obtained at B3LYP-D3/6-31G(d) level. . . . .                                                                                                                                                                                                                               | 54 |
| S11 | xyz coordinates of the optimized structure of <b>B</b> -(PP) <sub>10</sub> obtained at B3LYP-D3/6-31G(d) level. . . . .                                                                                                                                                                                                                               | 64 |
| S12 | xyz coordinates of the optimized structure of <b>A</b> -(PT) <sub>10</sub> obtained at B3LYP-D3/6-31G(d) level. . . . .                                                                                                                                                                                                                               | 70 |

|     |                                                                                                                      |    |
|-----|----------------------------------------------------------------------------------------------------------------------|----|
| S13 | xyz coordinates of the optimized structure of $\mathbf{B}-(\text{PT})_{10}$ obtained at B3LYP-D3/6-31G(d) level..... | 76 |
|-----|----------------------------------------------------------------------------------------------------------------------|----|

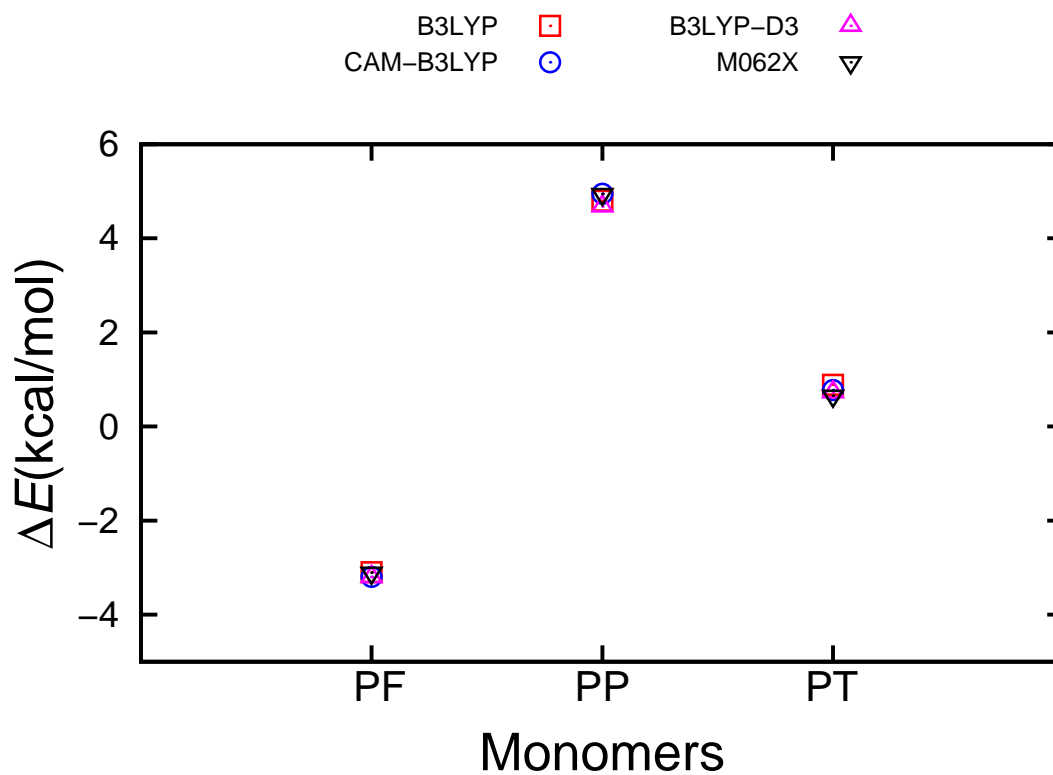

FIG. S1. Differences in energies ( $\Delta E$ ) between the two possible conformations (i.e.,  $E_i - E_{ii}$ ) of monomers calculated using B3LYP, CAM-B3LYP, B3LYP-D3 and M06-2X functionals in combination with 6-31G(d) basis set. Structures of conformations  $i$  and  $ii$  for  $(PF)_1$  are shown in Fig. 2.

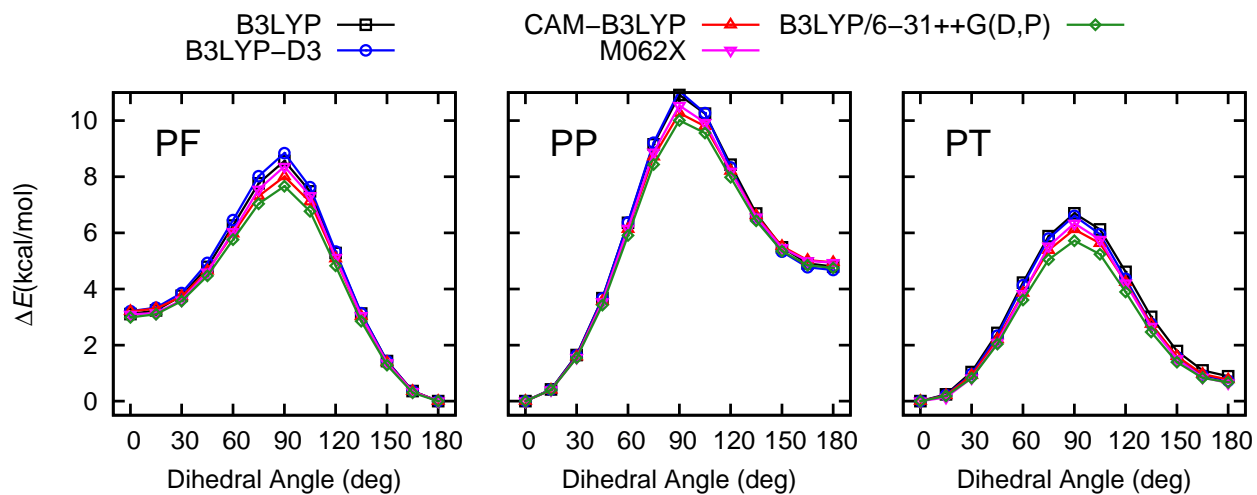

FIG. S2. Relaxed potential energy curves along  $\angle 1-2-3-4$ , for  $(PF)_1$  (a),  $(PP)_1$  (b) and  $(PT)_1$  (c). Energies are relative to the energy of the most stable structure in each case.

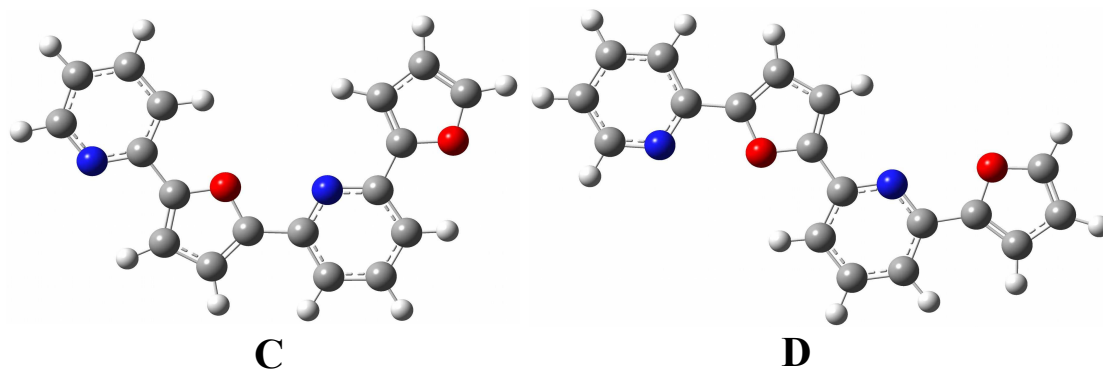

FIG. S3. Optimized structures of conformers **C** and **D** of  $(PF)_2$  calculated at B3LYP-D3/6-31G(d) level.



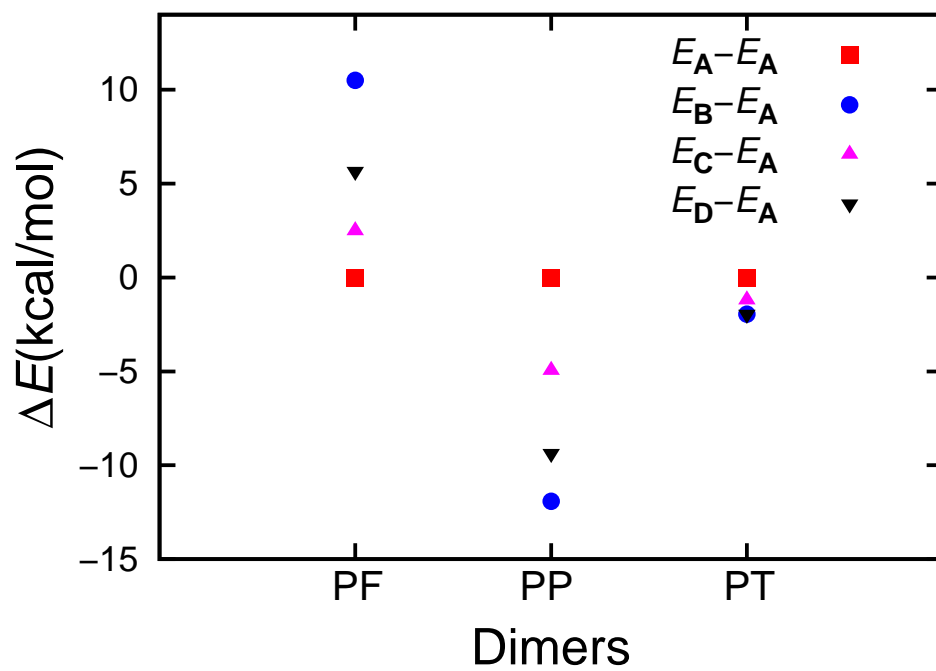

FIG. S4. Energies of different conformations of  $(PF)_2$ ,  $(PP)_2$  and  $(PT)_2$  with respect to that of **A** calculated at B3LYP-D3/6-31G(d) level.

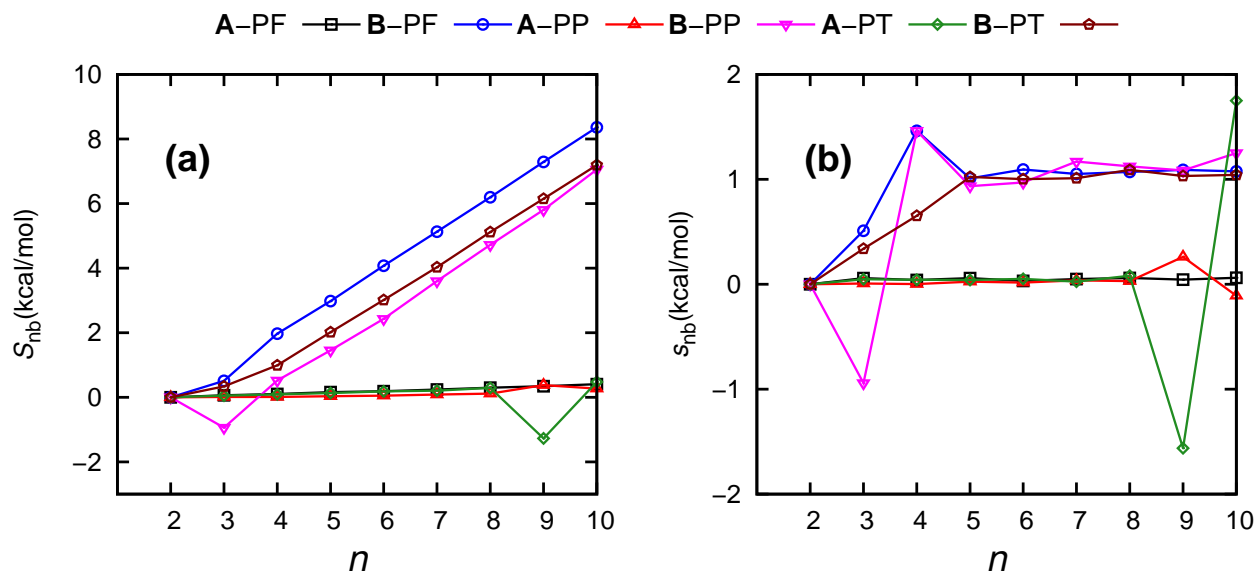

FIG. S5. Stabilization energies of the studied compounds at the B3LYP/6-31G(d) level.  $S_{nb} = [E_n - n \times E_1] - [(n-1)(E_2 - 2 \times E_1)]$  (a) and  $s_{nb} = (E_n - E_{n-1}) - (E_2 - E_1)$  (b) are plotted versus  $n > 1$ . Here,  $n$  and  $E_n$  are the number of repeating units and ground state energy of an oligomer having  $n$  number of repeating units, respectively.

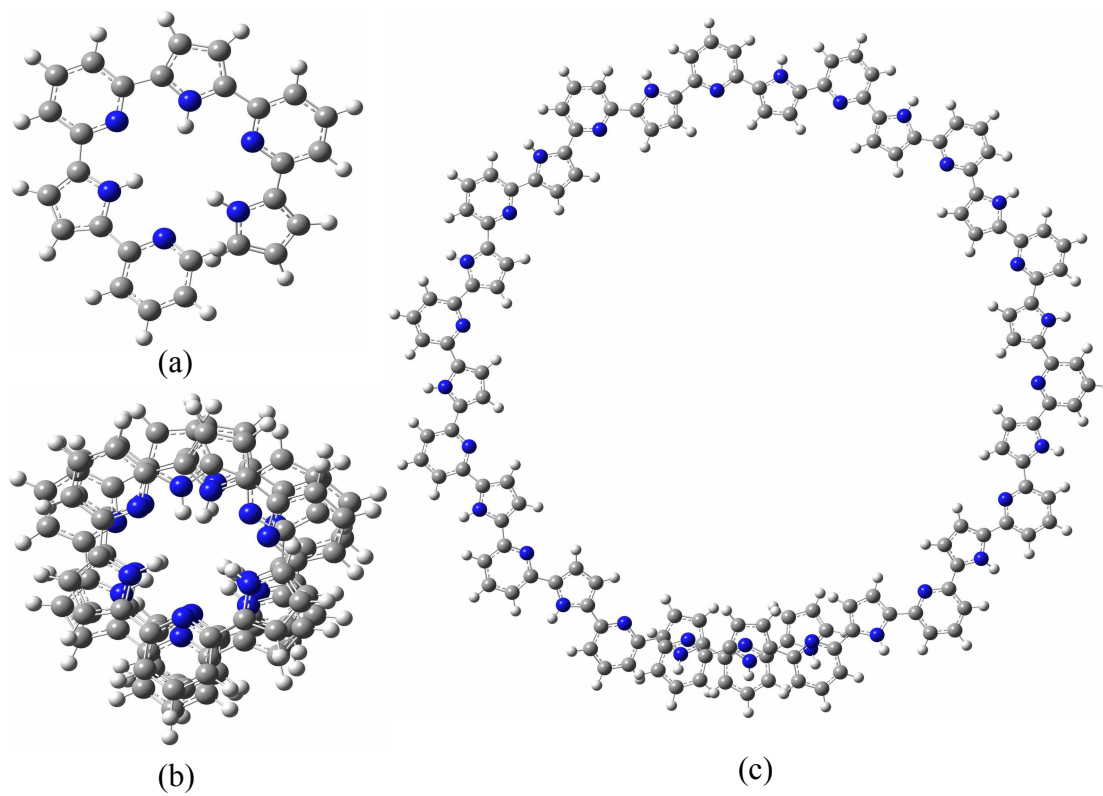

FIG. S6. Optimized structures of  $\mathbf{B}-(\text{PP})_3$  (a),  $\mathbf{B}-(\text{PP})_{10}$  (b) and  $\mathbf{A}-(\text{PP})_{16}$  (c) obtained at B3LYP-D3/6-31G(d) level.

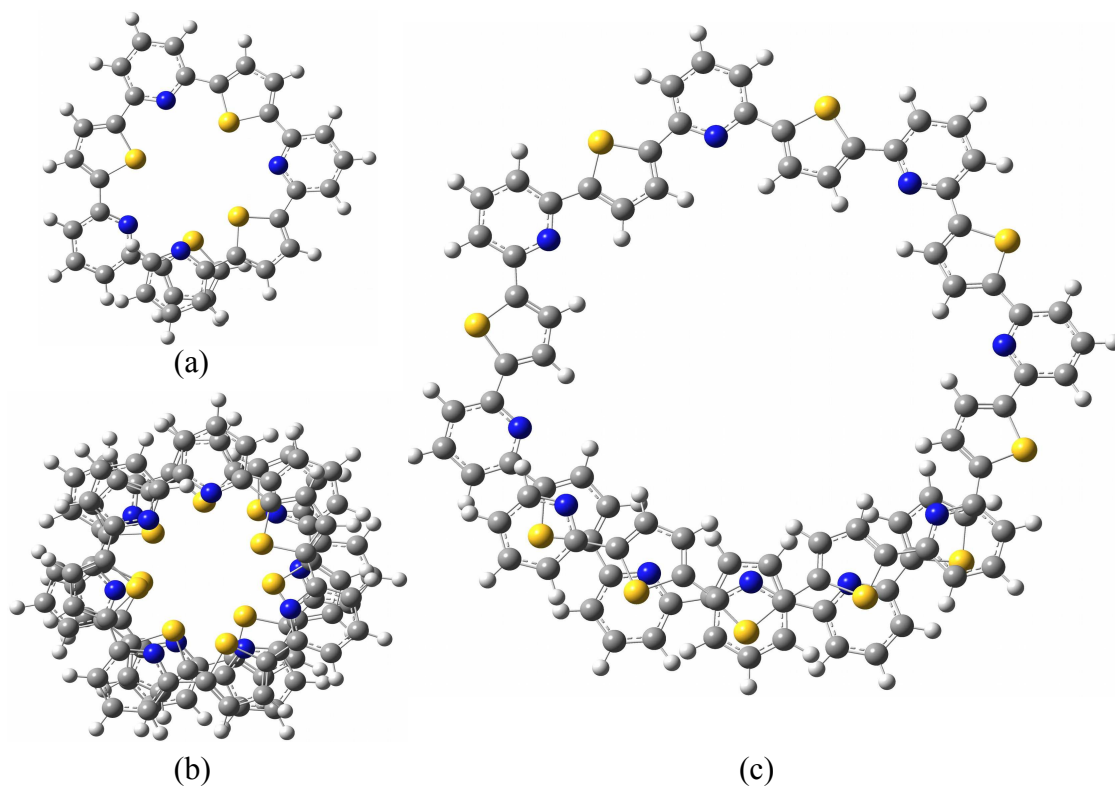

FIG. S7. Optimized structures of  $\mathbf{B}-(\text{PT})_4$  (a),  $\mathbf{B}-(\text{PT})_{10}$  (b) and  $\mathbf{A}-(\text{PT})_{10}$  (c) obtained at B3LYP-D3/6-31G(d) level.

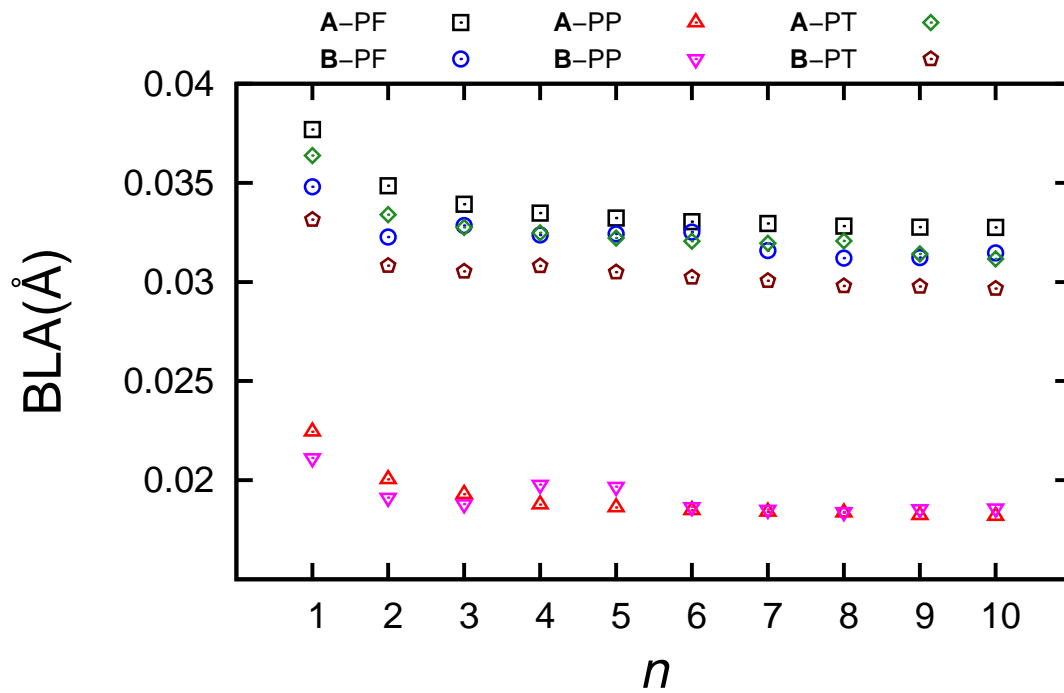

FIG. S8. Bond length alternation ( $\Delta r$ ) values calculated as  $(\frac{r_a+r_c+r_e}{3} - \frac{r_b+r_d}{2})/n$ . Here,  $r_x$  is bond length of the  $x$  bond in each repeating unit of an oligomer. These bonds are shown in Fig 1.

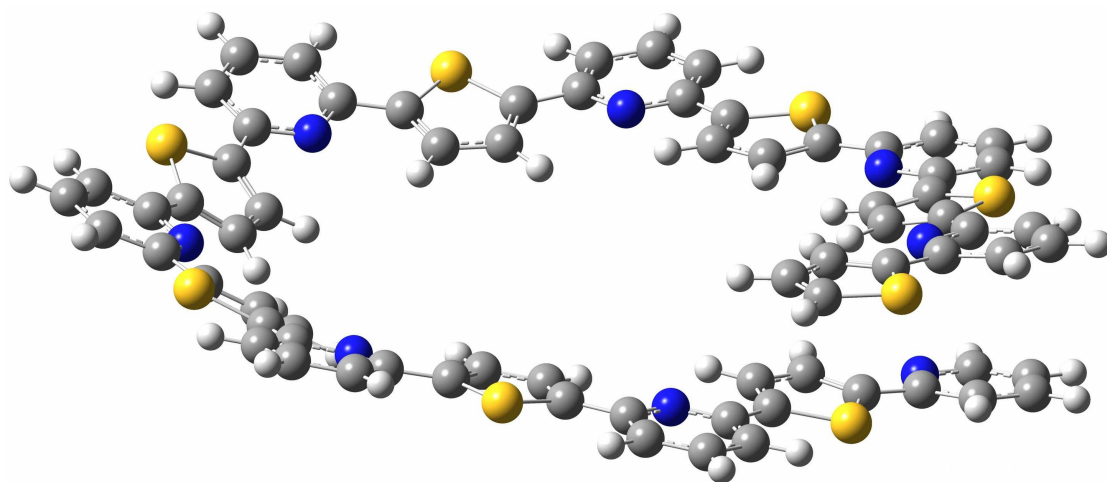

FIG. S9. Optimized structures of A-(PT)<sub>8</sub> obtained at B3LYP-D3/6-31G(d) level.

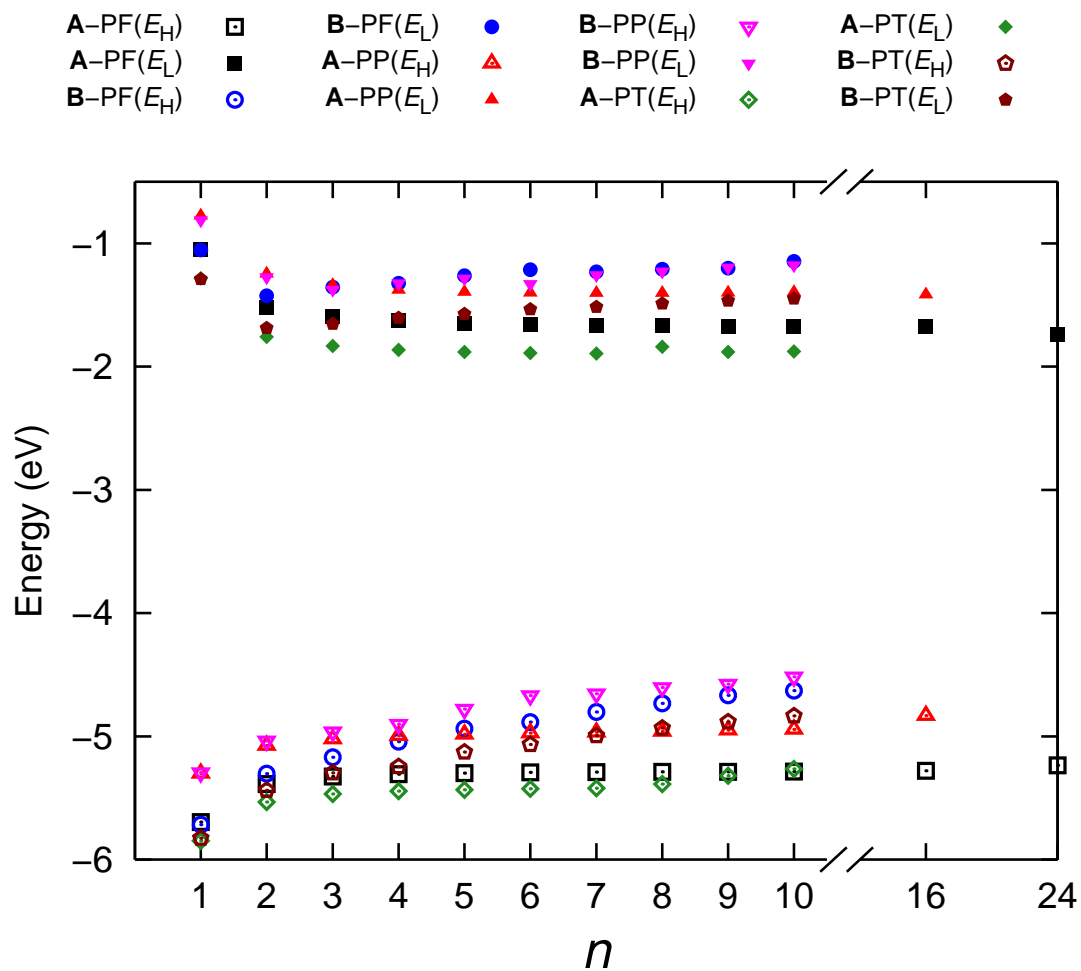

FIG. S10. Energies of HOMO and LUMO for all the studied compounds calculated at B3LYP-D3/6-31G(d) level.  $E_H$  and  $E_L$  represent energies of HOMO and LUMO, respectively.  $n$  stands for the number of repeating units.  $u$  values of **A-PF**, **B-PF**, **A-PP**, **B-PP**, **A-PT** and **B-PT** oligomers are 23, 3, 15, 3, 8 and 4, respectively.

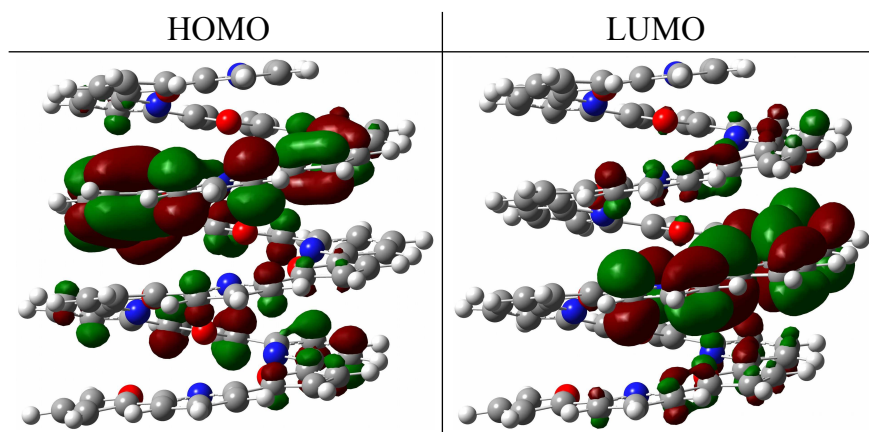

FIG. S11. HOMO and LUMO of  $\text{B}-(\text{PF})_{10}$  at an isosurface value of 0.02.



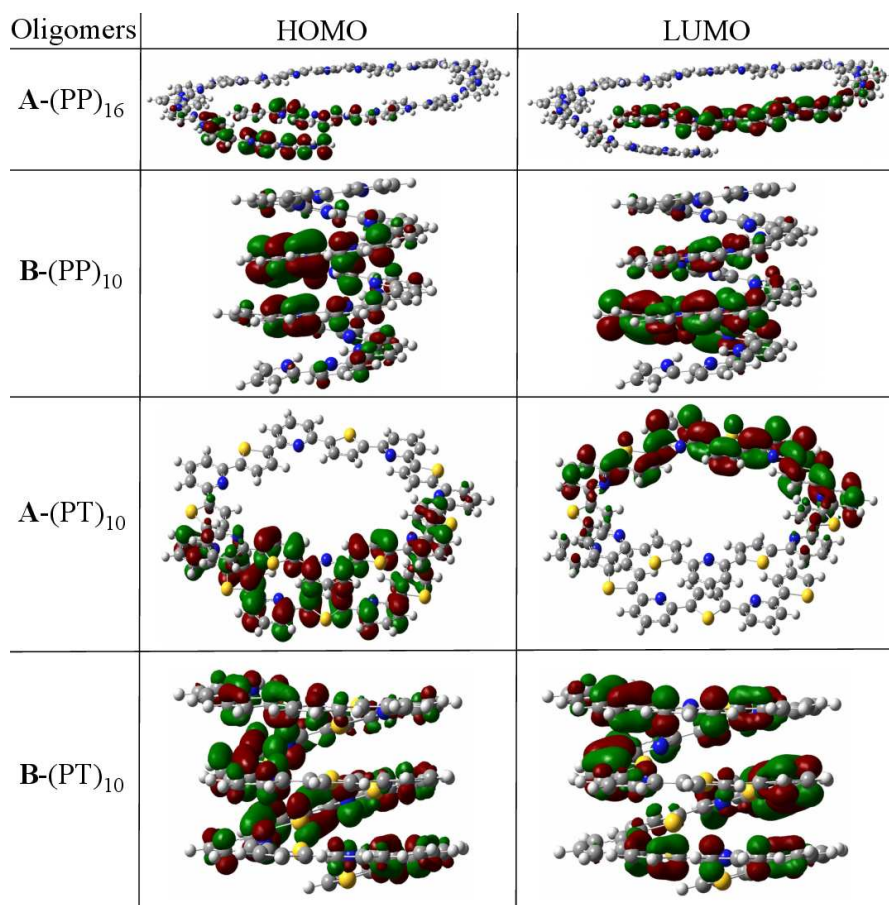

FIG. S12. Frontier molecular orbitals of **A**-(PP)<sub>16</sub>, **B**-(PP)<sub>10</sub>, **A**-(PT)<sub>10</sub> and **B**-(PT)<sub>10</sub> at an isosurface value of 0.02.

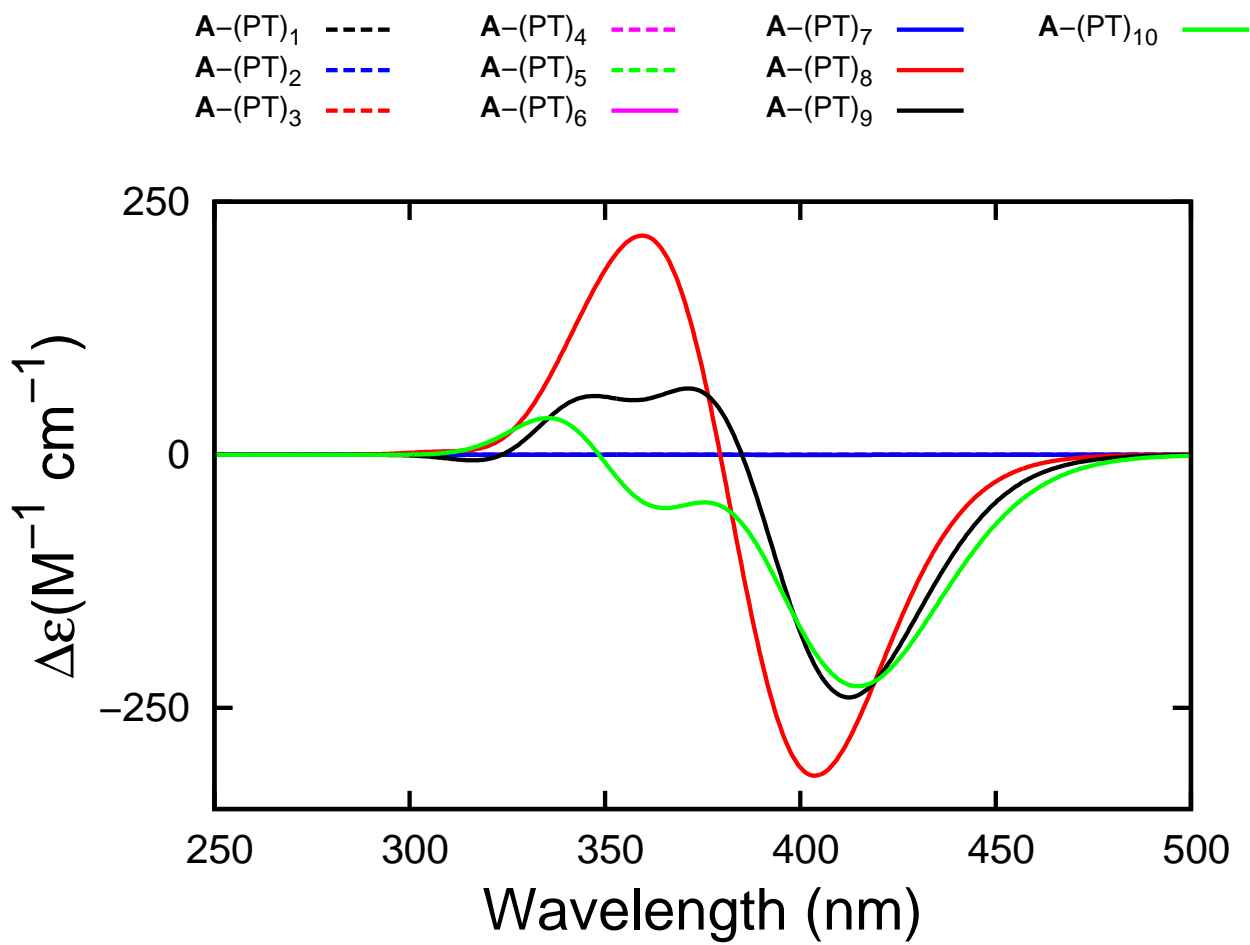

FIG. S13. CD spectra vs oligomer chain length of A-(PT).

TABLE S1. Differences in energies between the two possible conformations (i.e.,  $E_i - E_{ii}$ ) of monomers calculated using B3LYP, CAM-B3LYP, B3LYP-D3 and M06-2X functionals in combination with 6-31G(d) basis set. Values are in kcal/mol.

|    | B3LYP | CAM-B3LYP | B3LYP-D3 | M06-2X |
|----|-------|-----------|----------|--------|
| PF | -3.1  | -3.2      | -3.2     | -3.1   |
| PP | 4.8   | 5.0       | 4.7      | 5.0    |
| PT | 0.9   | 0.8       | 0.7      | 0.7    |

TABLE S2. Energies of different conformations of (PF)<sub>2</sub>, (PP)<sub>2</sub> and (PT)<sub>2</sub> with respect to that of **A** calculated at B3LYP-D3/6-31G(d) level. Values are in kcal/mol.

|    | $E_B - E_A$ | $E_C - E_A$ | $E_D - E_A$ |
|----|-------------|-------------|-------------|
| PF | 10.5        | 2.5         | 5.7         |
| PP | -11.9       | -5.0        | -9.4        |
| PT | -2.0        | -1.2        | -2.0        |

TABLE S3. The expectation values of the total spin,  $\langle S^2 \rangle$ , before annihilation (ba) and after annihilation (aa) of the studied molecules.

| $n$ | A-PF   |        | B-PF   |        | A-PP   |        | B-PP   |        | A-PT   |        | B-PT   |        |
|-----|--------|--------|--------|--------|--------|--------|--------|--------|--------|--------|--------|--------|
|     | ba     | aa     |
| 1   | 0.7652 | 0.7502 | 0.7647 | 0.7502 | 0.7661 | 0.7502 | 0.7652 | 0.7502 | 0.7665 | 0.7502 | 0.7658 | 0.7502 |
| 2   | 0.7661 | 0.7502 | 0.7663 | 0.7502 | 0.7678 | 0.7503 | 0.7684 | 0.7503 | 0.7669 | 0.7502 | 0.768  | 0.7503 |
| 3   | 0.7644 | 0.7502 | 0.7649 | 0.7502 | 0.7654 | 0.7502 | 0.7667 | 0.7502 | 0.7652 | 0.7502 | 0.7664 | 0.7502 |
| 4   | 0.7617 | 0.7501 | 0.7623 | 0.7501 | 0.7623 | 0.7501 | 0.7624 | 0.7501 | 0.7623 | 0.7501 | 0.7643 | 0.7502 |
| 5   | 0.7596 | 0.7501 | 0.7606 | 0.7501 | 0.7602 | 0.7501 | 0.7612 | 0.7501 | 0.7602 | 0.7501 | 0.761  | 0.7501 |
| 6   | 0.7583 | 0.7501 | 0.7597 | 0.7501 | 0.7587 | 0.7501 | 0.7598 | 0.7501 | 0.7588 | 0.7501 | 0.7595 | 0.7501 |
| 7   | 0.7573 | 0.7501 | 0.757  | 0.75   | 0.7577 | 0.7501 | 0.7576 | 0.7501 | 0.7578 | 0.7501 | 0.7585 | 0.7501 |
| 8   | 0.7565 | 0.75   | 0.7567 | 0.75   | 0.7568 | 0.75   | 0.7569 | 0.75   | 0.7568 | 0.75   | 0.7578 | 0.7501 |
| 9   | 0.7558 | 0.75   | 0.7571 | 0.7501 | 0.7562 | 0.75   | 0.757  | 0.7501 | 0.7564 | 0.75   | 0.7561 | 0.75   |
| 10  | 0.7553 | 0.75   | 0.7578 | 0.7501 | 0.7556 | 0.75   | 0.7561 | 0.75   | 0.7556 | 0.75   | 0.7582 | 0.7501 |
| 16  | 0.7534 | 0.75   |        |        | 0.7536 | 0.75   |        |        |        |        |        |        |
| 24  | 0.7525 | 0.75   |        |        |        |        |        |        |        |        |        |        |

TABLE S4. Electronic transition data obtained by TDDFT method for **A**-(PP)<sub>n</sub> and **B**-(PP)<sub>n</sub> at B3LYP-D3/6-31G(d) level.  $E_g$ ,  $f_{osc}$ , H and L denote excitation energy, oscillator strength, HOMO and LUMO, respectively. Electronic transitions are from  $S_0$  to  $S_m$ .  $E_g$ s are in eV.

| $n$ ( <b>A</b> ) | $m$ | $E_g$ | $f_{osc}$ | Configuration/s                  | $n$ ( <b>B</b> )                 | $m$  | $E_g$ | $f_{osc}$ | Configuration/s                     |
|------------------|-----|-------|-----------|----------------------------------|----------------------------------|------|-------|-----------|-------------------------------------|
| 1                | 1   | 4.13  | 0.145     | H → L (55%)<br>H → L+1 (42%)     | 1                                | 1    | 4.12  | 0.165     | H → L (62%)                         |
|                  | 2   | 4.49  | 0.427     | H → L (44%)<br>H → L+1 (54%)     | 14                               | 7.51 | 0.407 |           | H-4 → L+1 (40%)                     |
| 2                | 1   | 3.49  | 0.416     | H → L (63%)                      | 2                                | 1    | 3.37  | 0.390     | H → L (86%)                         |
|                  | 2   | 3.70  | 0.570     | H-1 → L (38%)<br>H → L (31%)     | 2                                | 3.79 | 0.344 |           | H-1 → L (88%)                       |
| 3                | 1   | 3.33  | 0.250     | H → L+1 (74%)                    | 3                                | 1    | 3.10  | 0.092     | H → L (86%)                         |
|                  | 2   | 3.41  | 0.907     | H → L (46%)                      | 8                                | 3.97 | 0.595 |           | H-2 → L+1 (34%)                     |
| 4                | 1   | 3.29  | 0.872     | H → L+2 (54%)                    | 4                                | 1    | 3.01  | 0.025     | H-1 → L (45%)<br>H → L+1 (33%)      |
| 5                | 1   | 3.26  | 2.407     | H → L+3 (55%)                    | 14                               | 3.98 | 0.373 |           | H-3 → L (20%)<br>H → L+4 (25%)      |
| 6                | 1   | 3.24  | 3.023     | H → L+4 (43%)                    | 5                                | 1    | 2.94  | 0.025     | H → L+1 (64%)                       |
| 7                | 1   | 3.22  | 3.340     | H → L+5 (33%)<br>H-1 → L-4 (22%) | 21                               | 3.93 | 0.397 |           | H-4 → L+3 (23%)                     |
|                  | 8   | 1     | 3.20      | 3.399                            | H → L+6 (27%)<br>H-1 → L+5 (20%) | 6    | 1     | 2.83      | 0.015                               |
| 9                | 1   | 3.19  | 3.209     | H → L+7 (21%)<br>H-1 → L+6 (19%) | 37                               | 4.06 | 0.617 |           | H-5 → L+3 (18%)                     |
|                  | 10  | 1     | 3.18      | 2.885                            | H → L+8 (19%)<br>H-1 → L+7 (17%) | 7    | 1     | 2.84      | 0.015                               |
| 10               | 2   | 3.27  | 3.484     | H → L+7 (14%)<br>H → L+8 (12%)   | 8                                | 1    | 2.84  | 0.012     | H → L (46%)                         |
|                  | 16  | 1     | 2.98      | 0.069                            | H → L (47%)                      | 9    | 1     | 2.84      | 0.022                               |
|                  | 5   | 3.21  | 3.595     | H → L+14 (12%)                   | 10                               | 1    | 2.80  | 0.003     | H → L (75%)                         |
|                  | 6   | 3.23  | 3.562     | H → L (6%)<br>H → L+4 (6%)       | 114                              | 4.15 | 0.243 |           | H-2 → L+13 (14%)<br>H → L+18 (12%)  |
|                  |     |       |           |                                  | 117                              | 4.18 | 0.310 |           | H-9 → L+7 (13%)<br>H-2 → L+15 (15%) |

TABLE S5. Electronic transition data obtained by TDDFT method for **A**-(PT)<sub>n</sub> and **B**-(PT)<sub>n</sub> at B3LYP-D3/6-31G(d) level.  $E_g$ ,  $f_{osc}$ , H and L denote excitation energy, oscillator strength, HOMO and LUMO, respectively. Electronic transitions are from  $S_0$  to  $S_m$ .  $E_g$ s are in eV.

| $n$ ( <b>A</b> ) | $m$ | $E_g$ | $f_{osc}$ | Configuration/s | $n$ ( <b>B</b> ) | $m$  | $E_g$ | $f_{osc}$       | Configuration/s |      |       |                 |                 |  |               |
|------------------|-----|-------|-----------|-----------------|------------------|------|-------|-----------------|-----------------|------|-------|-----------------|-----------------|--|---------------|
| 1                | 1   | 4.30  | 0.422     | H → L (90%)     | 1                | 1    | 4.26  | 0.400           | H → L (92%)     |      |       |                 |                 |  |               |
|                  | 18  | 7.26  | 0.436     | H-4 → L+1 (47%) |                  | 16   | 7.23  | 0.511           | H-4 → L+1 (39%) |      |       |                 |                 |  |               |
| 2                | 1   | 3.47  | 0.691     | H → L (82%)     | 2                | 1    | 3.40  | 0.555           | H → L (85%)     |      |       |                 |                 |  |               |
| 3                | 1   | 3.28  | 0.732     | H → L+1 (94%)   | 3                | 1    | 3.16  | 0.307           | H → L (82%)     |      |       |                 |                 |  |               |
| 4                | 1   | 3.23  | 1.277     | H → L+2 (77%)   | 4                | 3.62 | 0.422 | H-1 → L (61%)   |                 |      |       |                 |                 |  |               |
| 5                | 1   | 3.20  | 1.495     | H → L+3 (63%)   | 4                | 1    | 3.07  | 0.049           | H-1 → L (40%)   |      |       |                 |                 |  |               |
| 6                | 1   | 3.17  | 1.406     | H → L+4 (53%)   |                  |      |       |                 | H → L+1 (42%)   |      |       |                 |                 |  |               |
| 7                | 1   | 3.15  | 1.117     | H → L+5 (45%)   | 5                | 3.43 | 0.459 | H-1 → L+2 (72%) |                 |      |       |                 |                 |  |               |
|                  | 2   | 3.25  | 1.592     | H → L+4 (42%)   | 5                | 1    | 2.98  | 0.015           | H → L (56%)     |      |       |                 |                 |  |               |
| 8                | 1   | 3.13  | 0.016     | H → L+4 (13%)   | 24               | 4.02 | 0.389 | H-4 → L+3 (60%) |                 |      |       |                 |                 |  |               |
|                  | 2   | 3.23  | 0.651     | H-1 → L+4 (21%) |                  |      |       |                 | 6               | 1    | 2.96  | 0.019           | H → L+1 (56%)   |  |               |
| 9                | 1   | 3.07  | 0.065     | H → L+1 (30%)   | 17               | 3.48 | 0.258 | H-2 → L+3 (23%) |                 |      |       |                 |                 |  |               |
|                  |     |       |           | H → L+5 (35%)   |                  |      |       |                 | 7               | 1    | 2.93  | 0.011           | H-1 → L+1 (20%) |  |               |
|                  |     |       |           | H → L+7 (28%)   |                  |      |       |                 |                 |      |       |                 |                 |  | H → L (23%)   |
| 10               | 6   | 3.21  | 0.635     | H-1 → L+5 (17%) | 28               | 3.61 | 0.356 | H-3 → L+5 (44%) |                 |      |       |                 |                 |  |               |
|                  |     |       |           | H → L+3 (54%)   |                  |      |       |                 | 8               | 1    | 2.89  | 0.007           | H → L (48%)     |  |               |
|                  |     |       |           | H → L (30%)     |                  |      |       |                 | 35              | 3.56 | 0.301 | H-5 → L (26%)   |                 |  |               |
| 11               | 8   | 3.21  | 0.502     | H-2 → L+2 (18%) | 9                | 1    | 2.87  | 0.008           | H-1 → L (26%)   |      |       |                 |                 |  |               |
|                  |     |       |           | H-2 → L+4 (12%) |                  |      |       |                 |                 |      |       |                 |                 |  | H → L+1 (31%) |
|                  |     |       |           |                 |                  |      |       |                 | 45              | 3.56 | 0.154 | H-6 → L+1 (23%) |                 |  |               |
| 10               | 1   | 2.85  | 0.005     | H → L (49%)     | 52               | 3.52 | 0.163 | H-5 → L+5 (21%) |                 |      |       |                 |                 |  |               |
|                  |     |       |           |                 |                  |      |       |                 | 54              | 3.54 | 0.144 | H-4 → L+8 (26%) |                 |  |               |
|                  |     |       |           |                 |                  |      |       |                 | 108             | 4.08 | 0.157 | H → L+10 (19%)  |                 |  |               |

TABLE S6: xyz coordinates of the optimized structure of **A**-(PF)<sub>10</sub> obtained at B3LYP-D3/6-31G(d) level.

162

|   |         |         |        |
|---|---------|---------|--------|
| C | 14.2790 | -0.7472 | 0.0001 |
| C | 15.3586 | -1.5959 | 0.0002 |
| C | 13.5549 | -2.8675 | 0.0002 |
| C | 13.1184 | -1.5654 | 0.0002 |
| C | 16.7934 | -1.3554 | 0.0002 |
| N | 17.1647 | -0.0644 | 0.0001 |
| C | 18.4776 | 0.2198  | 0.0001 |
| C | 19.4740 | -0.7731 | 0.0002 |
| C | 19.0740 | -2.1058 | 0.0003 |
| C | 17.7173 | -2.4160 | 0.0002 |
| H | 20.5212 | -0.4937 | 0.0002 |
| H | 19.8162 | -2.8995 | 0.0003 |
| H | 17.3685 | -3.4422 | 0.0003 |
| H | 14.3391 | 0.3307  | 0.0001 |
| H | 12.0830 | -1.2597 | 0.0001 |
| C | 10.7970 | -5.1954 | 0.0002 |
| C | 11.3974 | -6.4675 | 0.0003 |
| C | 12.7872 | -6.5382 | 0.0003 |
| C | 13.5350 | -5.3646 | 0.0003 |
| C | 12.8463 | -4.1381 | 0.0002 |
| N | 11.5057 | -4.0543 | 0.0002 |
| H | 10.7823 | -7.3599 | 0.0003 |
| H | 13.2855 | -7.5038 | 0.0003 |
| H | 14.6187 | -5.3807 | 0.0003 |
| C | 7.2694  | -5.7697 | 0.0002 |
| C | 7.2034  | -4.3980 | 0.0002 |
| C | 8.5428  | -3.9263 | 0.0002 |

|   |         |         |         |
|---|---------|---------|---------|
| C | 9.3509  | -5.0366 | 0.0002  |
| H | 6.2901  | -3.8224 | 0.0002  |
| H | 8.8942  | -2.9055 | 0.0002  |
| O | 14.9241 | -2.8945 | 0.0002  |
| O | 8.5795  | -6.1682 | 0.0002  |
| C | 18.8144 | 1.6350  | 0.0001  |
| C | 18.0416 | 2.7702  | 0.0000  |
| O | 20.1398 | 1.9799  | 0.0001  |
| C | 18.9373 | 3.8722  | -0.0001 |
| H | 16.9621 | 2.7838  | 0.0000  |
| C | 20.2065 | 3.3477  | 0.0000  |
| H | 18.7035 | 4.9261  | -0.0001 |
| C | 21.5229 | 3.9673  | 0.0000  |
| C | 22.6987 | 3.1954  | 0.0001  |
| N | 21.5316 | 5.3106  | -0.0001 |
| C | 23.9212 | 3.8603  | 0.0001  |
| H | 22.6398 | 2.1131  | 0.0002  |
| C | 22.7190 | 5.9388  | -0.0001 |
| C | 23.9465 | 5.2516  | 0.0000  |
| H | 24.8502 | 3.2966  | 0.0001  |
| C | 22.6613 | 7.3922  | -0.0002 |
| H | 24.8793 | 5.8034  | 0.0000  |
| C | 21.6101 | 8.2759  | -0.0003 |
| O | 23.8441 | 8.0828  | -0.0002 |
| C | 22.1737 | 9.5792  | -0.0003 |
| H | 20.5672 | 7.9966  | -0.0003 |
| C | 23.5376 | 9.4178  | -0.0003 |
| H | 21.6640 | 10.5309 | -0.0004 |
| C | 24.6352 | 10.3715 | -0.0003 |
| N | 24.2773 | 11.6724 | -0.0004 |



|   |         |          |         |
|---|---------|----------|---------|
| C | 25.9767 | 9.9520   | -0.0003 |
| C | 25.2528 | 12.5818  | -0.0005 |
| C | 26.9761 | 10.9194  | -0.0003 |
| H | 26.2131 | 8.8937   | -0.0002 |
| C | 26.6149 | 12.2672  | -0.0004 |
| H | 24.9302 | 13.6220  | -0.0006 |
| H | 28.0223 | 10.6253  | -0.0003 |
| H | 27.3621 | 13.0547  | -0.0004 |
| C | 6.2416  | -6.7993  | 0.0002  |
| N | 4.9744  | -6.3536  | 0.0002  |
| C | 6.5702  | -8.1669  | 0.0002  |
| C | 3.9818  | -7.2587  | 0.0001  |
| C | 5.5312  | -9.0926  | 0.0002  |
| H | 7.6086  | -8.4777  | 0.0002  |
| C | 2.6339  | -6.7115  | 0.0001  |
| C | 4.2132  | -8.6461  | 0.0001  |
| H | 5.7476  | -10.1575 | 0.0002  |
| O | 1.5827  | -7.5893  | 0.0001  |
| C | 2.1598  | -5.4226  | 0.0001  |
| H | 3.3784  | -9.3374  | 0.0001  |
| C | 0.4312  | -6.8479  | 0.0001  |
| C | 0.7426  | -5.5104  | 0.0001  |
| H | 2.7767  | -4.5366  | 0.0002  |
| H | 0.0210  | -4.7075  | 0.0001  |
| C | -0.8387 | -7.5577  | 0.0000  |
| N | -1.9360 | -6.7829  | 0.0000  |
| C | -0.8957 | -8.9631  | 0.0000  |
| C | -3.1379 | -7.3827  | 0.0000  |
| C | -2.1481 | -9.5700  | -0.0001 |
| H | 0.0187  | -9.5450  | 0.0000  |

C -4.2854 -6.4883 0.0000  
C -3.2941 -8.7805 -0.0001  
H -2.2306 -10.6535 -0.0001  
O -5.5361 -7.0461 -0.0001  
C -4.3899 -5.1191 0.0001  
H -4.2860 -9.2175 -0.0001  
C -6.4418 -6.0188 -0.0001  
C -5.7774 -4.8169 0.0000  
H -3.5549 -4.4349 0.0001  
C -7.8571 -6.3554 -0.0001  
H -6.2521 -3.8473 0.0001  
N -8.7016 -5.3108 -0.0001  
C -8.2952 -7.6920 -0.0002  
C -10.0214 -5.5603 -0.0002  
C -9.6656 -7.9346 -0.0003  
H -7.5743 -8.5013 -0.0003  
C -10.8820 -4.3873 -0.0001  
C -10.5530 -6.8626 -0.0003  
H -10.0402 -8.9546 -0.0004  
O -12.2374 -4.5837 -0.0002  
C -10.6100 -3.0413 0.0000  
H -11.6264 -7.0125 -0.0003  
C -12.8293 -3.3487 -0.0002  
C -11.8630 -2.3730 0.0000  
H -9.6202 -2.6103 0.0001  
C -14.2828 -3.2870 -0.0003  
H -12.0563 -1.3109 0.0000  
N -14.8104 -2.0517 -0.0002  
C -15.0688 -4.4535 -0.0004  
C -16.1483 -1.9315 -0.0003

C -16.4533 -4.3129 -0.0005  
H -14.5959 -5.4287 -0.0004  
C -16.6560 -0.5682 -0.0002  
C -17.0147 -3.0395 -0.0004  
H -17.0921 -5.1920 -0.0006  
C -16.0263 0.6522 0.0000  
O -18.0135 -0.3866 -0.0003  
H -18.0883 -2.8910 -0.0005  
C -17.0488 1.6375 0.0000  
H -14.9564 0.7963 0.0001  
C -18.2451 0.9632 -0.0002  
H -16.9445 2.7120 0.0001  
C -19.6264 1.4201 -0.0003  
C -20.7013 0.5131 -0.0005  
N -19.7960 2.7526 -0.0001  
C -21.9946 1.0270 -0.0005  
H -20.5131 -0.5543 -0.0006  
C -21.0500 3.2343 -0.0002  
C -22.1865 2.4052 -0.0004  
H -22.8494 0.3560 -0.0007  
C -21.1659 4.6843 0.0000  
H -23.1786 2.8415 -0.0005  
C -20.2274 5.6867 0.0002  
O -22.4224 5.2294 -0.0001  
C -20.9425 6.9136 0.0003  
H -19.1588 5.5336 0.0004  
C -22.2773 6.5911 0.0001  
H -20.5493 7.9190 0.0005  
C -23.4817 7.4076 0.0000  
N -23.2803 8.7361 0.0003

|   |          |         |         |
|---|----------|---------|---------|
| C | -24.7631 | 6.8288  | -0.0003 |
| C | -24.3542 | 9.5420  | 0.0002  |
| C | -25.8665 | 7.6771  | -0.0004 |
| H | -24.8741 | 5.7506  | -0.0005 |
| C | -24.0705 | 10.9707 | 0.0005  |
| C | -25.6738 | 9.0552  | -0.0001 |
| H | -26.8724 | 7.2659  | -0.0006 |
| O | -25.1349 | 11.8372 | 0.0004  |
| C | -22.8988 | 11.6795 | 0.0009  |
| H | -26.5083 | 9.7468  | -0.0001 |
| C | -24.6224 | 13.0986 | 0.0007  |
| C | -23.2592 | 13.0618 | 0.0011  |
| H | -21.9102 | 11.2459 | 0.0010  |
| H | -25.3470 | 13.8990 | 0.0007  |
| H | -22.5938 | 13.9138 | 0.0014  |

TABLE S7: xyz coordinates of the optimized structure of **A**-(PF)<sub>24</sub> obtained at B3LYP/3-21G level.

386

|   |         |          |         |
|---|---------|----------|---------|
| C | 23.2564 | -6.4990  | -2.1206 |
| C | 21.9664 | -6.1937  | -1.6600 |
| N | 21.5167 | -4.9252  | -1.5415 |
| C | 22.3416 | -3.9156  | -1.8971 |
| C | 23.6449 | -4.1379  | -2.3720 |
| C | 24.1008 | -5.4496  | -2.4774 |
| C | 21.0351 | -7.2431  | -1.3018 |
| C | 19.7210 | -7.2094  | -0.9071 |
| C | 19.2946 | -8.5622  | -0.7313 |
| C | 20.3656 | -9.3698  | -1.0203 |
| O | 21.4643 | -8.5749  | -1.3753 |
| C | 20.5223 | -10.8088 | -1.0252 |
| N | 19.4142 | -11.5354 | -0.7640 |
| C | 19.5104 | -12.8827 | -0.7717 |
| C | 20.7187 | -13.5513 | -1.0268 |
| C | 21.8565 | -12.7913 | -1.2892 |
| C | 21.7669 | -11.4009 | -1.2945 |
| C | 18.2878 | -13.6172 | -0.5265 |
| C | 16.9978 | -13.2042 | -0.3060 |
| C | 16.1914 | -14.3762 | -0.1792 |
| C | 17.0203 | -15.4602 | -0.3247 |
| O | 18.3330 | -15.0181 | -0.5379 |
| C | 16.7617 | -16.8841 | -0.3081 |
| N | 15.4701 | -17.2570 | -0.1802 |
| C | 15.1767 | -18.5753 | -0.1750 |
| C | 16.1638 | -19.5678 | -0.2856 |
| C | 17.4935 | -19.1715 | -0.4120 |

C 17.8069 -17.8139 -0.4280  
C 13.7756 -18.9210 -0.0682  
C 12.6453 -18.1476 0.0171  
C 11.5262 -19.0335 0.0645  
C 12.0159 -20.3141 0.0074  
O 13.4146 -20.2752 -0.0731  
C 11.3555 -21.6017 0.0091  
N 10.0058 -21.5825 0.0481  
C 9.3435 -22.7593 0.0443  
C 10.0054 -23.9969 0.0066  
C 11.3981 -24.0047 -0.0314  
C 12.0919 -22.7964 -0.0322  
C 7.8987 -22.6831 0.0732  
C 7.0380 -21.6147 0.0969  
C 5.7095 -22.1388 0.1057  
C 5.8098 -23.5072 0.0875  
O 7.1619 -23.8753 0.0677  
C 4.8061 -24.5496 0.0845  
N 3.5186 -24.1421 0.0924  
C 2.5457 -25.0786 0.0894  
C 2.8238 -26.4548 0.0796  
C 4.1558 -26.8635 0.0715  
C 5.1679 -25.9061 0.0735  
C 1.1835 -24.5903 0.0947  
C 0.6648 -23.3200 0.0973  
C -0.7582 -23.4414 0.0991  
C -1.0541 -24.7813 0.0980  
O 0.1360 -25.5213 0.0952  
C -2.3138 -25.4935 0.1003  
N -3.4317 -24.7358 0.0994

C -4.6312 -25.3563 0.1023  
C -4.7569 -26.7547 0.1066  
C -3.5969 -27.5262 0.1073  
C -2.3539 -26.8969 0.1039  
C -5.7982 -24.5006 0.1001  
C -5.9352 -23.1354 0.0928  
C -7.3343 -22.8480 0.0931  
C -7.9982 -24.0488 0.1007  
O -7.0668 -25.0960 0.1051  
C -9.4078 -24.3755 0.1049  
N -10.2663 -23.3330 0.0985  
C -11.5921 -23.5898 0.1023  
C -12.1075 -24.8958 0.1129  
C -11.2125 -25.9634 0.1195  
C -9.8425 -25.7106 0.1154  
C -12.4712 -22.4403 0.0945  
C -12.2196 -21.0914 0.0827  
C -13.4820 -20.4231 0.0790  
C -14.4562 -21.3894 0.0887  
O -13.8558 -22.6557 0.0985  
C -15.9010 -21.3088 0.0902  
N -16.4344 -20.0682 0.0796  
C -17.7793 -19.9451 0.0801  
C -18.6384 -21.0557 0.0914  
C -18.0769 -22.3305 0.1022  
C -16.6908 -22.4697 0.1018  
C -18.3039 -18.5966 0.0682  
C -17.6879 -17.3705 0.0570  
C -18.7153 -16.3780 0.0485  
C -19.9193 -17.0361 0.0547

O -19.6939 -18.4192 0.0670  
C -21.2853 -16.5587 0.0505  
C -22.3654 -17.4560 0.0578  
C -23.6589 -16.9392 0.0529  
C -23.8461 -15.5587 0.0410  
C -22.7135 -14.7289 0.0346  
N -21.4550 -15.2188 0.0393  
C -22.8449 -13.2878 0.0229  
C -21.9139 -12.2799 0.0166  
C -22.6268 -11.0421 0.0067  
C -23.9658 -11.3416 0.0071  
O -24.1317 -12.7331 0.0171  
C -25.1463 -10.5047 0.0001  
C -26.4327 -11.0678 0.0005  
C -27.5324 -10.2127 -0.0065  
C -27.3300 -8.8345 -0.0135  
C -26.0116 -8.3509 -0.0131  
N -24.9383 -9.1704 -0.0066  
C -25.7384 -6.9300 -0.0189  
C -24.5642 -6.2201 -0.0189  
C -24.9056 -4.8331 -0.0244  
C -26.2751 -4.7491 -0.0275  
O -26.8207 -6.0398 -0.0242  
C -27.1767 -3.6173 -0.0324  
C -28.5688 -3.8003 -0.0362  
C -29.3874 -2.6732 -0.0400  
C -28.8097 -1.4055 -0.0400  
C -27.4090 -1.3077 -0.0362  
N -26.6057 -2.3933 -0.0327  
C -26.7507 -0.0191 -0.0352



|   |          |          |         |
|---|----------|----------|---------|
| C | -25.4251 | 0.3352   | -0.0321 |
| C | -25.3662 | 1.7624   | -0.0317 |
| C | -26.6579 | 2.2249   | -0.0344 |
| O | -27.5420 | 1.1375   | -0.0368 |
| C | -27.2076 | 3.5635   | -0.0343 |
| C | -28.5954 | 3.7766   | -0.0373 |
| C | -29.0665 | 5.0879   | -0.0365 |
| C | -28.1575 | 6.1434   | -0.0328 |
| C | -26.7854 | 5.8461   | -0.0300 |
| N | -26.3175 | 4.5791   | -0.0308 |
| C | -25.7930 | 6.8992   | -0.0258 |
| C | -24.4211 | 6.8683   | -0.0232 |
| C | -23.9651 | 8.2220   | -0.0192 |
| C | -25.0759 | 9.0275   | -0.0193 |
| O | -26.2290 | 8.2310   | -0.0235 |
| H | -9.1120  | -26.5068 | 0.1202  |
| H | -11.5792 | -26.9826 | 0.1278  |
| H | -13.1777 | -25.0442 | 0.1155  |
| H | -7.8109  | -21.8846 | 0.0883  |
| H | -5.1173  | -22.4379 | 0.0876  |
| H | -1.4284  | -27.4546 | 0.1044  |
| H | -3.6610  | -28.6075 | 0.1105  |
| H | -5.7416  | -27.1993 | 0.1088  |
| H | -1.4889  | -22.6531 | 0.1011  |
| H | 1.2509   | -22.4189 | 0.0975  |
| H | 6.2139   | -26.1766 | 0.0669  |
| H | 4.4027   | -27.9183 | 0.0635  |
| H | 2.0065   | -27.1616 | 0.0776  |
| H | 4.7837   | -21.5928 | 0.1224  |
| H | 7.3417   | -20.5837 | 0.1044  |

H 13.1712 -22.7544 -0.0634  
H 11.9377 -24.9436 -0.0614  
H 9.4262 -24.9092 0.0056  
H 10.4840 -18.7787 0.1299  
H 12.6385 -17.0729 0.0364  
H 18.8231 -17.4609 -0.5295  
H 18.2779 -19.9135 -0.5002  
H 15.8737 -20.6086 -0.2758  
H 15.1320 -14.4336 -0.0061  
H 16.6836 -12.1775 -0.2531  
H 22.6214 -10.7716 -1.4987  
H 22.8032 -13.2780 -1.4913  
H 20.7391 -14.6316 -1.0215  
H -11.2391 -20.6511 0.0773  
H -13.6691 -19.3647 0.0704  
H -19.7076 -20.8996 0.0912  
H -18.7133 -23.2069 0.1110  
H -16.2112 -23.4377 0.1099  
H -16.6237 -17.2194 0.0550  
H -18.6014 -15.3091 0.0387  
H -22.1719 -18.5190 0.0668  
H -24.5128 -17.6057 0.0581  
H -24.8303 -15.1133 0.0367  
H -22.2218 -10.0464 0.0003  
H -20.8494 -12.4290 0.0193  
H -26.5414 -12.1427 0.0060  
H -28.5375 -10.6166 -0.0066  
H -28.1522 -8.1337 -0.0188  
H -24.2400 -3.9889 -0.0259  
H -23.5829 -6.6589 -0.0152

|   |          |         |         |
|---|----------|---------|---------|
| H | 19.1430  | -6.3123 | -0.7786 |
| H | 18.3231  | -8.9151 | -0.4366 |
| H | 23.5652  | -7.5321 | -2.1892 |
| H | 24.2641  | -3.2928 | -2.6366 |
| H | -29.4047 | -0.5036 | -0.0426 |
| H | -30.4652 | -2.7816 | -0.0428 |
| H | -28.9723 | -4.8026 | -0.0356 |
| H | -24.6052 | -0.3598 | -0.0303 |
| H | -24.4916 | 2.3874  | -0.0293 |
| H | -28.4769 | 7.1756  | -0.0318 |
| H | -30.1316 | 5.2849  | -0.0386 |
| H | -29.2630 | 2.9271  | -0.0399 |
| H | -23.8285 | 5.9717  | -0.0243 |
| H | -22.9506 | 8.5773  | -0.0163 |
| O | 22.6352  | -1.5003 | -2.1437 |
| C | 21.8198  | -2.5727 | -1.7604 |
| C | 20.6213  | -2.0900 | -1.2966 |
| H | 19.8083  | -2.6998 | -0.9455 |
| C | 20.6770  | -0.6637 | -1.3775 |
| H | 19.9158  | 0.0436  | -1.1006 |
| C | 21.9064  | -0.3313 | -1.8909 |
| C | 22.5299  | 0.9434  | -2.1736 |
| C | 23.7795  | 1.0116  | -2.8051 |
| C | 24.3429  | 2.2623  | -3.0427 |
| C | 23.6485  | 3.4075  | -2.6449 |
| C | 22.4103  | 3.2511  | -2.0174 |
| N | 21.8500  | 2.0496  | -1.7812 |
| H | 24.2799  | 0.0962  | -3.0878 |
| H | 25.3095  | 2.3435  | -3.5257 |
| H | 24.0572  | 4.3967  | -2.8051 |

|   |          |         |         |
|---|----------|---------|---------|
| H | 21.8550  | 4.1189  | -1.6807 |
| C | -25.2289 | 10.4665 | -0.0155 |
| C | -26.5013 | 11.0599 | -0.0164 |
| C | -26.5861 | 12.4504 | -0.0121 |
| C | -25.4178 | 13.2093 | -0.0069 |
| C | -24.1839 | 12.5392 | -0.0063 |
| N | -24.0899 | 11.1921 | -0.0106 |
| H | -27.3802 | 10.4314 | -0.0204 |
| H | -27.5535 | 12.9381 | -0.0127 |
| H | -25.4354 | 14.2896 | -0.0032 |
| O | -22.9816 | 14.6726 | 0.0053  |
| C | -21.6517 | 15.1142 | 0.0104  |
| C | -20.8110 | 14.0297 | 0.0074  |
| H | -19.7376 | 14.0867 | 0.0103  |
| C | -21.6280 | 12.8580 | 0.0004  |
| H | -21.3102 | 11.8312 | -0.0034 |
| C | -22.9363 | 13.2720 | -0.0007 |
| C | -19.8116 | 18.2355 | 0.0313  |
| C | -20.8084 | 19.2243 | 0.0341  |
| C | -22.1425 | 18.8231 | 0.0284  |
| C | -22.4506 | 17.4645 | 0.0203  |
| C | -21.3953 | 16.5383 | 0.0181  |
| N | -20.0986 | 16.9158 | 0.0234  |
| H | -20.5226 | 20.2663 | 0.0406  |
| H | -22.9345 | 19.5622 | 0.0303  |
| H | -23.4704 | 17.1074 | 0.0159  |
| O | -18.0598 | 19.9466 | 0.0465  |
| C | -18.4086 | 18.5895 | 0.0369  |
| C | -17.2687 | 17.8256 | 0.0346  |
| H | -17.2514 | 16.7509 | 0.0276  |

|   |          |         |        |
|---|----------|---------|--------|
| C | -16.1563 | 18.7215 | 0.0430 |
| H | -15.1098 | 18.4753 | 0.0438 |
| C | -16.6594 | 19.9980 | 0.0501 |
| C | -16.0144 | 21.2933 | 0.0604 |
| C | -16.7681 | 22.4779 | 0.0674 |
| C | -16.0919 | 23.6958 | 0.0773 |
| C | -14.6989 | 23.7073 | 0.0799 |
| C | -14.0188 | 22.4789 | 0.0724 |
| N | -14.6639 | 21.2925 | 0.0629 |
| H | -17.8470 | 22.4206 | 0.0652 |
| H | -16.6452 | 24.6271 | 0.0830 |
| H | -14.1326 | 24.6275 | 0.0875 |
| O | -11.8582 | 23.6315 | 0.0855 |
| C | -10.4993 | 23.2893 | 0.0847 |
| C | -10.3731 | 21.9230 | 0.0736 |
| H | -9.4374  | 21.3942 | 0.0705 |
| C | -11.6919 | 21.3740 | 0.0672 |
| H | -11.9758 | 20.3373 | 0.0582 |
| C | -12.5727 | 22.4261 | 0.0745 |
| C | -9.5182  | 24.3529 | 0.0944 |
| C | -9.9115  | 25.7007 | 0.1062 |
| C | -8.9225  | 26.6817 | 0.1148 |
| C | -7.5816  | 26.3041 | 0.1111 |
| C | -7.2712  | 24.9348 | 0.0989 |
| N | -8.2215  | 23.9754 | 0.0911 |
| H | -10.9637 | 25.9466 | 0.1083 |
| H | -9.1940  | 27.7303 | 0.1240 |
| H | -6.7811  | 27.0298 | 0.1170 |
| O | -4.8757  | 25.4410 | 0.0969 |
| C | -3.6652  | 24.7350 | 0.0851 |

|   |         |         |         |
|---|---------|---------|---------|
| C | -3.9235 | 23.3874 | 0.0746  |
| H | -3.1715 | 22.6194 | 0.0640  |
| C | -5.3429 | 23.2262 | 0.0795  |
| H | -5.9035 | 22.3090 | 0.0735  |
| C | -5.8969 | 24.4814 | 0.0926  |
| C | -2.4279 | 25.4855 | 0.0820  |
| C | -2.4339 | 26.8895 | 0.0961  |
| C | -1.2126 | 27.5595 | 0.0890  |
| C | -0.0282 | 26.8266 | 0.0674  |
| C | -0.1077 | 25.4247 | 0.0545  |
| N | -1.2860 | 24.7646 | 0.0626  |
| H | -3.3772 | 27.4161 | 0.1115  |
| H | -1.1840 | 28.6424 | 0.0996  |
| H | 0.9414  | 27.3032 | 0.0601  |
| O | 2.3335  | 25.2540 | 0.0082  |
| C | 1.0887  | 24.6110 | 0.0293  |
| C | 1.2776  | 23.2519 | 0.0176  |
| H | 0.4875  | 22.5232 | 0.0290  |
| C | 2.6868  | 23.0183 | -0.0123 |
| C | 4.6989  | 24.6287 | -0.0498 |
| C | 5.0738  | 25.9819 | -0.0538 |
| C | 6.4305  | 26.2958 | -0.0886 |
| C | 7.3712  | 25.2692 | -0.1184 |
| C | 6.9148  | 23.9411 | -0.1114 |
| N | 5.6023  | 23.6249 | -0.0775 |
| H | 4.3088  | 26.7444 | -0.0306 |
| H | 6.7514  | 27.3305 | -0.0925 |
| H | 8.4334  | 25.4650 | -0.1461 |
| O | 9.2186  | 23.1206 | -0.1817 |
| C | 9.8836  | 21.8872 | -0.1996 |

|   |         |         |         |
|---|---------|---------|---------|
| C | 8.9610  | 20.8721 | -0.1700 |
| C | 7.8474  | 22.8348 | -0.1399 |
| C | 7.6659  | 21.4748 | -0.1325 |
| H | 9.2015  | 19.8244 | -0.1749 |
| H | 6.7100  | 20.9839 | -0.1027 |
| C | 3.3042  | 24.2437 | -0.0181 |
| H | 3.1994  | 22.0737 | -0.0288 |
| C | 11.3303 | 21.8876 | -0.2417 |
| C | 12.0487 | 23.0938 | -0.2724 |
| C | 13.4398 | 23.0386 | -0.3106 |
| C | 14.0764 | 21.7999 | -0.3158 |
| C | 13.2863 | 20.6395 | -0.2829 |
| N | 11.9367 | 20.6806 | -0.2477 |
| H | 11.5116 | 24.0313 | -0.2657 |
| H | 14.0220 | 23.9518 | -0.3352 |
| H | 15.1526 | 21.7081 | -0.3430 |
| O | 15.2955 | 19.2459 | -0.3031 |
| C | 13.8969 | 19.3271 | -0.2797 |
| C | 13.3682 | 18.0614 | -0.2482 |
| H | 12.3173 | 17.8360 | -0.2245 |
| C | 14.4627 | 17.1424 | -0.2492 |
| H | 14.4228 | 16.0684 | -0.2259 |
| C | 15.6177 | 17.8822 | -0.2818 |
| C | 18.5869 | 15.8015 | -0.2254 |
| C | 19.6487 | 16.7197 | -0.2584 |
| C | 19.3516 | 18.0795 | -0.3075 |
| C | 18.0207 | 18.4897 | -0.3193 |
| C | 17.0162 | 17.5089 | -0.2838 |
| N | 17.2922 | 16.1873 | -0.2410 |
| H | 20.6656 | 16.3552 | -0.2428 |

|   |         |         |         |
|---|---------|---------|---------|
| H | 20.1489 | 18.8122 | -0.3340 |
| H | 17.7424 | 19.5330 | -0.3521 |
| O | 20.1729 | 13.9454 | -0.0998 |
| C | 20.1364 | 12.5470 | -0.0188 |
| C | 18.8311 | 12.1245 | -0.0352 |
| H | 18.5180 | 11.0975 | 0.0188  |
| C | 18.0075 | 13.2891 | -0.1253 |
| H | 16.9340 | 13.3373 | -0.1559 |
| C | 18.8415 | 14.3781 | -0.1605 |
| C | 21.3917 | 11.8351 | 0.0938  |
| C | 22.6119 | 12.5303 | 0.1045  |
| C | 23.7910 | 11.8024 | 0.2445  |
| C | 23.7295 | 10.4171 | 0.3732  |
| C | 22.4701 | 9.7960  | 0.3487  |
| N | 21.3204 | 10.4909 | 0.2063  |
| H | 22.6096 | 13.6064 | 0.0099  |
| H | 24.7477 | 12.3101 | 0.2568  |
| H | 24.6168 | 9.8121  | 0.4916  |
| O | 23.5173 | 7.6182  | 0.7217  |
| C | 22.3506 | 8.3602  | 0.4884  |
| C | 21.2725 | 7.5126  | 0.4534  |
| H | 20.2546 | 7.8205  | 0.2959  |
| C | 21.7643 | 6.1879  | 0.6728  |
| H | 21.2000 | 5.2742  | 0.7306  |
| C | 23.1243 | 6.2786  | 0.8366  |
| C | 24.1358 | 5.2879  | 1.1431  |
| C | 25.4635 | 5.6681  | 1.3930  |
| C | 26.3834 | 4.6785  | 1.7351  |
| C | 25.9654 | 3.3531  | 1.8174  |
| C | 24.6211 | 3.0521  | 1.5386  |



|   |         |         |         |
|---|---------|---------|---------|
| N | 23.7217 | 4.0040  | 1.2046  |
| H | 25.7396 | 6.7108  | 1.3289  |
| H | 27.4147 | 4.9395  | 1.9399  |
| H | 26.6414 | 2.5533  | 2.0833  |
| O | 25.0198 | 0.6891  | 2.0344  |
| C | 24.1404 | 1.6894  | 1.5895  |
| C | 22.9377 | 1.1235  | 1.2489  |
| H | 22.1025 | 1.6525  | 0.8264  |
| C | 23.0504 | -0.2817 | 1.4786  |
| H | 22.3059 | -1.0366 | 1.3033  |
| C | 24.3147 | -0.5196 | 1.9552  |
| C | 24.9777 | -1.7408 | 2.3595  |
| C | 26.2897 | -1.7272 | 2.8586  |
| C | 26.8655 | -2.9365 | 3.2444  |
| C | 26.1328 | -4.1153 | 3.1235  |
| C | 24.8280 | -4.0451 | 2.6066  |
| N | 24.2602 | -2.8791 | 2.2329  |
| H | 26.8191 | -0.7882 | 2.9372  |
| H | 27.8761 | -2.9598 | 3.6355  |
| H | 26.5373 | -5.0753 | 3.4111  |
| O | 24.5548 | -6.4582 | 2.8953  |
| C | 24.0265 | -5.2411 | 2.4430  |
| C | 22.7889 | -5.4499 | 1.8972  |
| H | 22.1673 | -4.6959 | 1.4483  |
| C | 22.5100 | -6.8568 | 2.0076  |
| H | 21.6208 | -7.3588 | 1.6669  |
| C | 23.5888 | -7.4343 | 2.6111  |
| H | 23.8378 | -8.4379 | 2.9019  |
| H | 25.1040 | -5.6520 | -2.8339 |

TABLE S8: xyz coordinates of the optimized structure of **B-(PF)<sub>10</sub>** obtained at B3LYP-D3/6-31G(d) level.

|     |        |         |         |
|-----|--------|---------|---------|
| 162 |        |         |         |
| N   | 2.6632 | -0.4103 | -1.7257 |
| C   | 2.7849 | -1.5392 | -2.4373 |
| C   | 3.6153 | -1.6364 | -3.5732 |
| C   | 4.3373 | -0.5185 | -3.9664 |
| C   | 4.2220 | 0.6550  | -3.2326 |
| C   | 3.3684 | 0.6652  | -2.1148 |
| H   | 3.6882 | -2.5626 | -4.1322 |
| H   | 4.9940 | -0.5641 | -4.8313 |
| H   | 4.8001 | 1.5335  | -3.4953 |
| C   | 3.2401 | 1.8941  | -1.3381 |
| O   | 2.6088 | 1.8473  | -0.1383 |
| C   | 2.6589 | 3.0896  | 0.4122  |
| C   | 3.3131 | 3.9479  | -0.4419 |
| C   | 3.6890 | 3.1776  | -1.5715 |
| H   | 4.2289 | 3.5226  | -2.4419 |
| H   | 3.5250 | 4.9921  | -0.2631 |
| C   | 2.1038 | 3.2576  | 1.7502  |
| C   | 1.9538 | 4.5316  | 2.3316  |
| C   | 1.4793 | 4.6041  | 3.6381  |
| C   | 1.1593 | 3.4336  | 4.3240  |
| C   | 1.3180 | 2.2104  | 3.6505  |
| N   | 1.7841 | 2.1341  | 2.3963  |
| H   | 2.2053 | 5.4286  | 1.7751  |
| H   | 1.3578 | 5.5699  | 4.1219  |
| H   | 0.7935 | 3.4620  | 5.3453  |
| C   | 0.9942 | -1.2666 | 4.2744  |
| C   | 0.3193 | -0.8770 | 5.4108  |

C 0.3266 0.5455 5.4125  
C 0.9965 0.9309 4.2720  
O 1.4023 -0.1694 3.5931  
H -0.1282 -1.5288 6.1474  
H -0.1291 1.2011 6.1411  
C 1.3619 -2.5519 3.6864  
N 2.2980 -2.5006 2.7309  
C 0.7564 -3.7528 4.0916  
C 2.6550 -3.6305 2.1123  
C 1.1386 -4.9271 3.4489  
H -0.0180 -3.7529 4.8516  
C 2.0962 -4.8795 2.4402  
C 3.6709 -3.5003 1.0706  
H 0.6743 -5.8720 3.7158  
H 2.3979 -5.7799 1.9148  
O 4.2393 -2.2767 0.9063  
C 4.2164 -4.3848 0.1665  
C 5.1454 -2.3625 -0.1014  
C 5.1653 -3.6503 -0.5918  
H 3.9494 -5.4245 0.0444  
C 5.8844 -1.1537 -0.4522  
H 5.7824 -4.0231 -1.3972  
C 6.7498 -1.1415 -1.5611  
N 5.6985 -0.0798 0.3303  
C 7.4247 0.0382 -1.8567  
H 6.8698 -2.0234 -2.1810  
C 6.3542 1.0520 0.0401  
C 7.2287 1.1600 -1.0578  
H 8.0942 0.0859 -2.7118  
C 6.1362 2.1895 0.9310

H 7.7400 2.0930 -1.2713  
C 6.6677 3.4557 0.9829  
O 5.2477 2.0313 1.9563  
C 6.0680 4.1063 2.1037  
H 7.4007 3.8724 0.3065  
C 5.2168 3.1914 2.6543  
H 6.2471 5.1139 2.4526  
H 4.5348 3.2141 3.4903  
C 2.0329 -2.7218 -2.0223  
O 1.1641 -2.6571 -0.9737  
C 2.0459 -4.0039 -2.5275  
C 0.6209 -3.8959 -0.8038  
C 1.1435 -4.7574 -1.7442  
H 2.6433 -4.3667 -3.3511  
C -0.3648 -4.1377 0.2485  
H 0.8974 -5.8017 -1.8698  
N -0.7770 -3.1094 1.0024  
C -0.8431 -5.4524 0.4293  
C -1.6890 -3.3492 1.9598  
C -1.7816 -5.6882 1.4238  
H -0.4846 -6.2657 -0.1915  
C -2.2227 -4.6271 2.2041  
H -2.1774 -6.6883 1.5803  
H -2.9834 -4.7728 2.9625  
C -2.1355 -2.2322 2.7869  
O -1.8432 -0.9675 2.3933  
C -2.8544 -2.1926 3.9638  
C -2.3744 -0.1083 3.3045  
C -3.0059 -0.8224 4.2971  
H -3.2234 -3.0423 4.5208

C -2.1943 1.3200 3.0659  
H -3.5287 -0.4106 5.1485  
N -1.6937 1.6550 1.8755  
C -2.5247 2.2781 4.0438  
C -1.4934 2.9489 1.5908  
C -2.3106 3.6197 3.7432  
H -2.9192 1.9752 5.0085  
C -0.9443 3.2182 0.2681  
C -1.7876 3.9757 2.5025  
H -2.5496 4.3878 4.4745  
O -0.8328 2.1479 -0.5547  
C -0.4540 4.3383 -0.3679  
H -1.6176 5.0147 2.2423  
C -0.2618 2.5557 -1.7131  
C -0.0060 3.9082 -1.6467  
H -0.3990 5.3367 0.0429  
C -0.0530 1.5240 -2.7240  
H 0.4406 4.5155 -2.4205  
N -0.6825 0.3633 -2.5097  
C 0.7755 1.7424 -3.8382  
C -0.5015 -0.6407 -3.3731  
C 0.9678 0.6893 -4.7270  
H 1.2856 2.6908 -3.9708  
C -1.2370 -1.8723 -3.0955  
C 0.3301 -0.5267 -4.5013  
H 1.6221 0.8109 -5.5855  
C -1.2601 -3.1157 -3.6899  
O -2.1229 -1.8464 -2.0691  
H 0.4615 -1.3607 -5.1822  
C -2.2152 -3.8861 -2.9737

H -0.6537 -3.4399 -4.5231  
C -2.7188 -3.0636 -1.9886  
H -2.4936 -4.9145 -3.1576  
C -3.7103 -3.2485 -0.9329  
C -4.2625 -4.5126 -0.6548  
N -4.0545 -2.1508 -0.2486  
C -5.1885 -4.6126 0.3795  
H -3.9566 -5.3887 -1.2172  
C -4.9516 -2.2527 0.7395  
C -5.5461 -3.4753 1.0996  
H -5.6297 -5.5753 0.6250  
C -5.3014 -1.0011 1.4073  
H -6.2773 -3.5235 1.9006  
O -4.8820 0.1373 0.8005  
C -5.9960 -0.6804 2.5528  
C -5.3007 1.1944 1.5389  
C -5.9914 0.7390 2.6411  
H -6.4359 -1.3768 3.2528  
C -4.9781 2.5177 1.0123  
H -6.4481 1.3469 3.4098  
N -4.4832 2.5421 -0.2328  
C -5.1831 3.6839 1.7680  
C -4.1555 3.7181 -0.7790  
C -4.8414 4.9055 1.1926  
H -5.5705 3.6293 2.7800  
C -4.3143 4.9385 -0.0944  
C -3.6279 3.6739 -2.1396  
H -4.9773 5.8282 1.7507  
H -4.0398 5.8787 -0.5620  
O -3.5985 2.4634 -2.7583

C -3.1207 4.6343 -2.9864  
C -3.0720 2.6348 -3.9978  
C -2.7595 3.9644 -4.1842  
H -3.0076 5.6870 -2.7694  
C -2.9548 1.4590 -4.8551  
H -2.3342 4.4062 -5.0744  
N -3.5767 0.3366 -4.4484  
C -2.2177 1.5220 -6.0515  
C -3.4678 -0.7492 -5.2138  
C -2.1298 0.3827 -6.8429  
H -1.7068 2.4363 -6.3354  
C -2.7635 -0.7861 -6.4200  
H -3.9626 -1.6426 -4.8368  
H -1.5607 0.4028 -7.7689  
H -2.7094 -1.7031 -6.9990

TABLE S9: xyz coordinates of the optimized structure of **A**-(PP)<sub>10</sub> obtained at B3LYP-D3/6-31G(d) level.

172

|   |         |         |         |
|---|---------|---------|---------|
| C | 13.3387 | 0.5161  | -0.6484 |
| C | 14.4477 | -0.3176 | -0.5309 |
| C | 15.1671 | 1.8225  | -0.3796 |
| C | 13.7860 | 1.8475  | -0.5535 |
| C | 14.5169 | -1.7730 | -0.5615 |
| N | 13.3333 | -2.4102 | -0.5670 |
| C | 13.3079 | -3.7537 | -0.5972 |
| C | 14.4886 | -4.5230 | -0.6240 |
| C | 15.7118 | -3.8614 | -0.6162 |
| C | 15.7410 | -2.4713 | -0.5862 |
| H | 14.4568 | -5.6070 | -0.6784 |
| H | 16.6394 | -4.4270 | -0.6467 |
| H | 16.6914 | -1.9469 | -0.6099 |
| H | 12.3293 | 0.1634  | -0.7986 |
| H | 13.1997 | 2.7521  | -0.6162 |
| C | 16.3381 | 5.2133  | 0.1120  |
| C | 17.7440 | 5.1100  | 0.1105  |
| C | 18.3174 | 3.8610  | -0.1023 |
| C | 17.4987 | 2.7517  | -0.2864 |
| C | 16.1018 | 2.9308  | -0.2303 |
| N | 15.5445 | 4.1398  | -0.0455 |
| H | 18.3736 | 5.9761  | 0.2909  |
| H | 19.3986 | 3.7524  | -0.1247 |
| H | 17.9356 | 1.7785  | -0.4892 |
| C | 15.3771 | 8.7232  | 0.4776  |
| C | 14.1290 | 8.1266  | 0.6327  |
| C | 14.2986 | 6.7334  | 0.5195  |



|   |         |         |         |
|---|---------|---------|---------|
| C | 15.6499 | 6.4842  | 0.2961  |
| H | 13.2168 | 8.6724  | 0.8228  |
| H | 13.5466 | 5.9629  | 0.6034  |
| C | 15.7384 | 10.1353 | 0.5089  |
| C | 17.0781 | 10.5694 | 0.5463  |
| C | 17.3303 | 11.9374 | 0.5493  |
| C | 16.2663 | 12.8325 | 0.5332  |
| C | 14.9530 | 12.3195 | 0.5311  |
| N | 14.7076 | 10.9978 | 0.5103  |
| H | 17.9007 | 9.8624  | 0.5946  |
| H | 18.3532 | 12.3047 | 0.5664  |
| H | 16.4566 | 13.9013 | 0.5105  |
| C | 13.7756 | 13.1789 | 0.5417  |
| C | 12.4367 | 12.8418 | 0.3953  |
| C | 11.6754 | 14.0335 | 0.4698  |
| C | 12.5615 | 15.0769 | 0.6644  |
| H | 12.0791 | 11.8346 | 0.2415  |
| H | 10.6008 | 14.1239 | 0.3883  |
| H | 12.3944 | 16.1382 | 0.7811  |
| N | 15.5519 | 0.4976  | -0.3870 |
| H | 16.4709 | 0.1731  | -0.1317 |
| N | 16.2915 | 7.7063  | 0.2939  |
| H | 17.2437 | 7.8470  | -0.0044 |
| N | 13.8274 | 14.5534 | 0.6981  |
| H | 14.6617 | 15.0860 | 0.8864  |
| C | 11.9815 | -4.3579 | -0.6034 |
| C | 10.7352 | -3.7508 | -0.7328 |
| N | 11.7596 | -5.7151 | -0.4895 |
| C | 9.7547  | -4.7593 | -0.6762 |
| H | 10.5894 | -2.6891 | -0.8651 |

|   |         |          |         |
|---|---------|----------|---------|
| C | 10.4056 | -5.9792  | -0.5130 |
| H | 12.4645 | -6.3878  | -0.2332 |
| H | 8.6834  | -4.6506  | -0.7571 |
| C | 9.8444  | -7.3192  | -0.3986 |
| C | 10.6440 | -8.4789  | -0.4466 |
| N | 8.5095  | -7.3792  | -0.2532 |
| C | 10.0274 | -9.7166  | -0.2974 |
| H | 11.7150 | -8.4200  | -0.6159 |
| C | 7.9141  | -8.5779  | -0.1289 |
| C | 8.6487  | -9.7808  | -0.1256 |
| H | 10.6192 | -10.6281 | -0.3150 |
| C | 6.4640  | -8.5487  | 0.0132  |
| H | 8.1618  | -10.7394 | 0.0261  |
| C | 5.6174  | -7.4615  | 0.2119  |
| N | 5.6719  | -9.6785  | -0.0151 |
| C | 4.2980  | -7.9481  | 0.2818  |
| H | 5.9554  | -6.4405  | 0.3079  |
| C | 4.3439  | -9.3307  | 0.1268  |
| H | 5.9909  | -10.5886 | -0.3073 |
| H | 3.3899  | -7.3866  | 0.4441  |
| C | 3.2548  | -10.2990 | 0.1257  |
| C | 3.4819  | -11.6885 | 0.1928  |
| N | 2.0161  | -9.7805  | 0.0685  |
| C | 2.3846  | -12.5424 | 0.1569  |
| H | 4.4852  | -12.0916 | 0.2925  |
| C | 0.9568  | -10.6078 | 0.0542  |
| C | 1.1023  | -12.0096 | 0.0765  |
| H | 2.5282  | -13.6192 | 0.1915  |
| H | 0.2408  | -12.6673 | 0.0112  |
| C | -0.3475 | -9.9599  | 0.0012  |

C -0.6614 -8.6242 -0.2340  
N -1.5406 -10.6328 0.1695  
C -2.0626 -8.4948 -0.1858  
H 0.0710 -7.8561 -0.4333  
C -2.5991 -9.7517 0.0795  
H -1.6153 -11.5768 0.5141  
H -2.6536 -7.6042 -0.3392  
C -3.9932 -10.1484 0.2294  
C -4.3913 -11.4988 0.2975  
N -4.8802 -9.1401 0.2883  
C -5.7412 -11.7847 0.4716  
H -3.6714 -12.3055 0.1979  
C -6.1864 -9.4202 0.4362  
C -6.6590 -10.7429 0.5536  
H -6.0768 -12.8160 0.5433  
C -7.0769 -8.2674 0.4778  
H -7.7103 -10.9535 0.7250  
C -6.7668 -6.9135 0.5723  
N -8.4530 -8.3659 0.4434  
C -7.9761 -6.1922 0.5735  
H -5.7616 -6.5263 0.6477  
C -9.0201 -7.1083 0.4800  
H -8.9557 -9.2080 0.2115  
H -8.1128 -5.1238 0.6502  
C -10.4578 -6.8725 0.4443  
C -11.3965 -7.9161 0.5725  
N -10.8329 -5.5909 0.2918  
C -12.7497 -7.6036 0.4996  
H -11.0813 -8.9405 0.7466  
C -12.1418 -5.2895 0.2399

C -13.1406 -6.2807 0.3220  
H -13.4973 -8.3883 0.5812  
C -12.4555 -3.8755 0.0788  
H -14.1935 -6.0316 0.2302  
C -11.6059 -2.8092 -0.2043  
N -13.7325 -3.3615 0.1690  
C -12.3869 -1.6403 -0.2698  
H -10.5413 -2.9073 -0.3564  
C -13.7109 -1.9956 -0.0246  
H -14.5324 -3.8802 0.4945  
H -12.0598 -0.6332 -0.4812  
C -14.8997 -1.1536 0.0179  
N -14.6778 0.1677 -0.0929  
C -16.1982 -1.6827 0.1613  
C -15.7201 1.0161 -0.0693  
C -17.2747 -0.8028 0.1866  
H -16.3704 -2.7528 0.2273  
C -17.0480 0.5642 0.0687  
C -15.3844 2.4282 -0.2015  
H -18.2883 -1.1821 0.2858  
H -17.8853 1.2553 0.0572  
C -14.1571 3.0204 -0.4878  
N -16.3042 3.4485 -0.0712  
C -14.3445 4.4154 -0.5102  
H -13.2463 2.4694 -0.6686  
C -15.6859 4.6706 -0.2386  
H -17.2416 3.3298 0.2785  
H -13.6114 5.1816 -0.7142  
C -16.3856 5.9460 -0.1525  
C -17.7905 6.0329 -0.0783

|   |          |         |         |
|---|----------|---------|---------|
| N | -15.6033 | 7.0391  | -0.1605 |
| C | -18.3728 | 7.2914  | 0.0290  |
| H | -18.4145 | 5.1454  | -0.1237 |
| C | -16.1702 | 8.2549  | -0.0766 |
| C | -17.5647 | 8.4233  | 0.0410  |
| H | -19.4527 | 7.3897  | 0.1032  |
| C | -15.2480 | 9.3829  | -0.1036 |
| H | -18.0062 | 9.4081  | 0.1607  |
| C | -13.8596 | 9.3923  | -0.0023 |
| N | -15.6540 | 10.6964 | -0.2231 |
| C | -13.4297 | 10.7306 | -0.0805 |
| H | -13.2561 | 8.5066  | 0.1299  |
| C | -14.5572 | 11.5340 | -0.2309 |
| H | -16.5895 | 10.9798 | -0.4677 |
| H | -12.4201 | 11.1093 | -0.0246 |
| C | -14.6471 | 12.9818 | -0.3618 |
| C | -15.8754 | 13.6712 | -0.3453 |
| N | -13.4701 | 13.6322 | -0.4955 |
| C | -15.8795 | 15.0545 | -0.4898 |
| H | -16.8127 | 13.1409 | -0.2015 |
| C | -13.4955 | 14.9585 | -0.6240 |
| C | -14.6649 | 15.7240 | -0.6365 |
| H | -16.8184 | 15.6018 | -0.4804 |
| H | -12.5243 | 15.4412 | -0.7256 |
| H | -14.6198 | 16.8025 | -0.7510 |

TABLE S10: xyz coordinates of the optimized structure of **A**-(PP)<sub>16</sub> obtained at B3LYP-D3/6-31G(d) level.

274

|   |         |          |         |
|---|---------|----------|---------|
| C | 13.8300 | -2.3220  | 0.9262  |
| C | 12.7507 | -1.8845  | 0.1693  |
| C | 12.7151 | -0.4713  | 0.2393  |
| C | 13.7685 | -0.0732  | 1.0429  |
| C | 14.2933 | -3.6772  | 1.1724  |
| C | 15.5275 | -3.9542  | 1.8020  |
| C | 15.8871 | -5.2829  | 2.0055  |
| C | 15.0324 | -6.3016  | 1.5896  |
| C | 13.8221 | -5.9426  | 0.9591  |
| N | 13.4731 | -4.6604  | 0.7622  |
| C | 12.8692 | -6.9339  | 0.4819  |
| C | 11.7015 | -6.7511  | -0.2527 |
| C | 11.1135 | -8.0156  | -0.4496 |
| C | 11.9299 | -8.9623  | 0.1602  |
| C | 11.7728 | -10.4060 | 0.2596  |
| C | 12.8554 | -11.2521 | 0.5773  |
| C | 12.6143 | -12.6151 | 0.7086  |
| C | 11.3288 | -13.1082 | 0.5044  |
| C | 10.3102 | -12.2035 | 0.1440  |
| N | 10.5360 | -10.8815 | 0.0373  |
| C | 8.9419  | -12.6271 | -0.1228 |
| C | 7.1962  | -14.0279 | -0.4569 |
| C | 6.7217  | -12.7211 | -0.5531 |
| C | 7.8069  | -11.8501 | -0.3463 |
| C | 6.4727  | -15.2850 | -0.5982 |
| N | 5.1726  | -15.1711 | -0.9217 |
| C | 4.4304  | -16.2815 | -1.0706 |

C 4.9695 -17.5713 -0.8903  
C 6.3158 -17.6869 -0.5620  
C 7.0877 -16.5397 -0.4128  
C 3.0339 -16.0645 -1.4264  
C 0.9299 -16.5678 -2.0898  
C 0.9924 -15.1941 -1.8735  
C 2.3018 -14.8810 -1.4605  
C -0.1914 -17.3881 -2.5296  
N -1.2678 -16.7155 -2.9719  
C -2.3372 -17.4014 -3.4112  
C -2.3605 -18.8105 -3.4416  
C -1.2542 -19.5034 -2.9619  
C -0.1542 -18.7966 -2.4883  
C -3.4621 -16.5934 -3.8644  
C -5.5517 -16.1138 -4.5883  
C -4.8439 -14.9180 -4.5040  
C -3.5433 -15.2165 -4.0546  
C -6.9271 -16.3507 -5.0078  
N -7.6907 -15.2535 -5.1507  
C -8.9734 -15.3912 -5.5283  
C -9.5547 -16.6544 -5.7593  
C -8.7562 -17.7858 -5.6309  
C -7.4227 -17.6456 -5.2619  
C -9.7280 -14.1526 -5.6708  
C -11.4397 -12.7896 -6.2479  
C -10.4643 -12.0125 -5.6290  
C -9.3983 -12.8606 -5.2713  
C -12.7275 -12.3943 -6.8038  
N -12.9533 -11.0707 -6.8701  
C -14.1138 -10.6270 -7.3830

C -15.0978 -11.5065 -7.8786  
C -14.8705 -12.8754 -7.7883  
C -13.6808 -13.3381 -7.2367  
C -14.2870 -9.1801 -7.4004  
C -15.3453 -7.1937 -7.6350  
C -14.0268 -6.9347 -7.2718  
C -13.3677 -8.1712 -7.1268  
C -16.4363 -6.2663 -7.9063  
N -16.2164 -4.9860 -7.5607  
C -17.1836 -4.0752 -7.7666  
C -18.4339 -4.4228 -8.3171  
C -18.6491 -5.7436 -8.6952  
C -17.6432 -6.6843 -8.5029  
C -16.8629 -2.7099 -7.3706  
C -17.1020 -0.4685 -7.1700  
C -15.9295 -0.8334 -6.5142  
C -15.7806 -2.2284 -6.6391  
C -17.7078 0.8474 -7.3287  
N -16.9503 1.8899 -6.9458  
C -17.4377 3.1364 -7.0706  
C -18.7133 3.3904 -7.6141  
C -19.5029 2.3087 -7.9886  
C -19.0109 1.0167 -7.8393  
C -16.5609 4.2088 -6.6178  
C -15.9315 6.3022 -6.0326  
C -14.8269 5.4676 -5.8869  
C -15.2187 4.1646 -6.2514  
C -16.0548 7.7334 -5.7871  
N -15.0192 8.3091 -5.1522  
C -15.0651 9.6244 -4.8786



C -16.1780 10.4204 -5.2178  
C -17.2380 9.8264 -5.8942  
C -17.1840 8.4705 -6.1979  
H -3.2104 -19.3532 -3.8441  
H -1.2498 -20.5902 -2.9567  
H 0.7001 -19.3265 -2.0780  
H -2.7232 -14.5333 -3.8915  
H -5.2516 -13.9529 -4.7660  
H -10.6066 -16.7535 -6.0093  
H -9.1714 -18.7728 -5.8175  
H -6.7804 -18.5185 -5.1952  
H -8.4833 -12.5991 -4.7606  
H -10.5551 -10.9503 -5.4569  
H -16.0075 -11.1338 -8.3397  
H -15.6174 -13.5790 -8.1468  
H -13.5084 -14.4049 -7.1310  
H -12.3340 -8.3469 -6.8688  
H -13.6145 -5.9438 -7.1516  
H -19.2254 -3.6878 -8.4285  
H -19.5968 -6.0384 -9.1383  
H -17.7848 -7.7101 -8.8293  
H -14.9952 -2.8516 -6.2377  
H -15.2845 -0.1399 -5.9952  
H -19.0725 4.4045 -7.7604  
H -20.4975 2.4720 -8.3953  
H -19.6326 0.1637 -8.0938  
H -14.6133 3.2706 -6.2745  
H -13.8521 5.8035 -5.5660  
H -16.2259 11.4701 -4.9448  
H -18.1026 10.4180 -6.1836

H -17.9890 8.0040 -6.7577  
H 0.1558 -14.5225 -1.9957  
H 2.7009 -13.9136 -1.1941  
H 8.1361 -16.6241 -0.1432  
H 6.7600 -18.6676 -0.4126  
H 4.3507 -18.4595 -0.9744  
H 5.6912 -12.4643 -0.7490  
H 7.8030 -10.7701 -0.3427  
H 11.1268 -14.1677 0.6321  
H 13.4247 -13.2926 0.9651  
H 13.8564 -10.8510 0.6977  
H 11.3478 -5.7919 -0.5999  
H 10.2073 -8.2494 -0.9886  
H 15.3133 -7.3410 1.7195  
H 16.8389 -5.5253 2.4725  
H 16.1969 -3.1539 2.0979  
H 14.0638 0.9070 1.3865  
H 12.0035 0.1865 -0.2405  
H 12.0858 -2.5391 -0.3745  
N -16.9699 5.5214 -6.4977  
H -17.9318 5.8202 -6.5311  
N -17.6642 -1.6264 -7.6673  
H -18.4275 -1.6489 -8.3247  
N -15.4776 -8.5640 -7.7283  
H -16.3612 -9.0427 -7.8034  
N -10.9813 -14.0912 -6.2449  
H -11.3998 -14.8419 -6.7711  
N -4.6882 -17.1223 -4.2126  
H -4.9713 -18.0715 -4.0278  
N 2.1756 -17.0815 -1.7922

H 2.4697 -18.0188 -2.0170  
N 8.5461 -13.9465 -0.1853  
H 9.1713 -14.7346 -0.1377  
N 13.0114 -8.2911 0.6953  
H 13.5781 -8.6795 1.4354  
N 14.4534 -1.1927 1.4325  
H 15.1336 -1.1981 2.1786  
C -12.5082 11.7317 -3.3305  
C -11.9477 10.4796 -3.0909  
C -12.8115 9.5082 -3.6315  
C -13.8972 10.1701 -4.1989  
N -13.7013 11.5196 -3.9901  
H -14.2548 12.2462 -4.4151  
H -11.0170 10.3230 -2.5664  
H -12.6979 8.4345 -3.6153  
C -12.0112 13.0541 -2.9723  
C -12.7762 14.2230 -3.1598  
C -12.2259 15.4442 -2.7867  
C -10.9479 15.4829 -2.2403  
C -10.2450 14.2707 -2.0862  
N -10.7743 13.0888 -2.4466  
H -13.7849 14.1820 -3.5596  
H -12.7966 16.3611 -2.9086  
H -10.5238 16.4283 -1.9160  
C -8.9021 14.2166 -1.5223  
C -8.1400 13.1123 -1.1499  
N -8.1510 15.3386 -1.2394  
C -6.9106 13.5836 -0.6516  
H -8.4751 12.0891 -1.2323  
C -6.9250 14.9743 -0.7225

|   |         |         |         |
|---|---------|---------|---------|
| H | -8.3928 | 16.2728 | -1.5284 |
| H | -6.0850 | 13.0053 | -0.2644 |
| C | -5.8994 | 15.9335 | -0.3322 |
| C | -6.1276 | 17.3245 | -0.3357 |
| N | -4.7185 | 15.4061 | 0.0352  |
| C | -5.0935 | 18.1684 | 0.0542  |
| H | -7.0929 | 17.7398 | -0.6088 |
| C | -3.7209 | 16.2243 | 0.4127  |
| C | -3.8719 | 17.6255 | 0.4372  |
| H | -5.2433 | 19.2446 | 0.0721  |
| C | -2.4780 | 15.5690 | 0.7998  |
| H | -3.0699 | 18.2753 | 0.7739  |
| C | -2.2106 | 14.2153 | 0.9865  |
| N | -1.3120 | 16.2527 | 1.0777  |
| C | -0.8599 | 14.0891 | 1.3637  |
| H | -2.9432 | 13.4310 | 0.8671  |
| C | -0.3072 | 15.3663 | 1.4066  |
| H | -1.1644 | 17.2299 | 0.8815  |
| H | -0.3178 | 13.1862 | 1.6025  |
| C | 1.0484  | 15.7802 | 1.7453  |
| C | 1.3946  | 17.1323 | 1.9439  |
| N | 1.9473  | 14.7884 | 1.8688  |
| C | 2.7186  | 17.4428 | 2.2347  |
| H | 0.6486  | 17.9197 | 1.8930  |
| C | 3.2217  | 15.0903 | 2.1714  |
| C | 3.6554  | 16.4206 | 2.3420  |
| H | 3.0193  | 18.4776 | 2.3768  |
| C | 4.1265  | 13.9553 | 2.3020  |
| H | 4.6987  | 16.6538 | 2.5324  |
| C | 3.9243  | 12.6176 | 1.9739  |

|   |         |         |        |
|---|---------|---------|--------|
| N | 5.4120  | 14.0620 | 2.7921 |
| C | 5.1008  | 11.9121 | 2.2920 |
| H | 3.0153  | 12.2316 | 1.5367 |
| C | 6.0168  | 12.8217 | 2.8135 |
| H | 5.7741  | 14.8780 | 3.2596 |
| H | 5.3025  | 10.8601 | 2.1551 |
| C | 7.3741  | 12.5989 | 3.2950 |
| N | 7.7436  | 11.3126 | 3.4208 |
| C | 8.2483  | 13.6614 | 3.6009 |
| C | 8.9766  | 11.0236 | 3.8714 |
| C | 9.5159  | 13.3590 | 4.0868 |
| H | 7.9562  | 14.6954 | 3.4449 |
| C | 9.8935  | 12.0291 | 4.2386 |
| C | 9.2972  | 9.6050  | 3.9647 |
| H | 10.2070 | 14.1568 | 4.3459 |
| H | 10.8680 | 11.7825 | 4.6493 |
| C | 8.4649  | 8.4983  | 3.8214 |
| N | 10.5610 | 9.1272  | 4.2460 |
| C | 9.2485  | 7.3419  | 3.9990 |
| H | 7.4045  | 8.5592  | 3.6258 |
| C | 10.5562 | 7.7469  | 4.2514 |
| H | 11.3959 | 9.6914  | 4.2370 |
| H | 8.9280  | 6.3110  | 3.9720 |
| C | 11.7428 | 6.9408  | 4.5062 |
| N | 11.6112 | 5.6226  | 4.2774 |
| C | 12.9483 | 7.5019  | 4.9745 |
| C | 12.6641 | 4.8122  | 4.4797 |
| C | 14.0417 | 6.6634  | 5.1630 |
| H | 13.0250 | 8.5599  | 5.2067 |
| C | 13.9149 | 5.3022  | 4.9064 |

|   |         |         |        |
|---|---------|---------|--------|
| C | 12.4320 | 3.3982  | 4.2144 |
| H | 14.9891 | 7.0692  | 5.5084 |
| H | 14.7713 | 4.6433  | 5.0141 |
| C | 11.3508 | 2.7795  | 3.5932 |
| N | 13.3326 | 2.4045  | 4.5455 |
| C | 11.5964 | 1.3924  | 3.5761 |
| H | 10.5014 | 3.3089  | 3.1877 |
| C | 12.8258 | 1.1703  | 4.1875 |
| H | 14.1085 | 2.5330  | 5.1764 |
| H | 10.9909 | 0.6122  | 3.1396 |
| C | 13.5435 | -0.0808 | 4.3900 |
| N | 12.8211 | -1.2007 | 4.2251 |
| C | 14.9198 | -0.1127 | 4.6997 |
| C | 13.4177 | -2.3977 | 4.3617 |
| C | 15.5276 | -1.3536 | 4.8806 |
| H | 15.5004 | 0.8015  | 4.7788 |
| C | 14.7795 | -2.5150 | 4.7179 |
| C | 12.5724 | -3.5579 | 4.1337 |
| H | 16.5813 | -1.4139 | 5.1424 |
| H | 15.2349 | -3.4866 | 4.8739 |
| C | 11.1938 | -3.6188 | 3.9515 |
| N | 13.0487 | -4.8556 | 4.1115 |
| C | 10.8400 | -4.9711 | 3.7910 |
| H | 10.5426 | -2.7573 | 3.9599 |
| C | 12.0048 | -5.7287 | 3.8781 |
| H | 14.0133 | -5.0878 | 3.9204 |
| H | 9.8546  | -5.3888 | 3.6471 |
| C | 12.1652 | -7.1734 | 3.8139 |
| N | 11.0761 | -7.8689 | 3.4203 |
| C | 13.3706 | -7.8176 | 4.1598 |

|   |         |          |        |
|---|---------|----------|--------|
| C | 11.1643 | -9.1958  | 3.3503 |
| C | 13.4410 | -9.2067  | 4.0852 |
| H | 14.2253 | -7.2447  | 4.5050 |
| C | 12.3180 | -9.9222  | 3.6678 |
| H | 14.3585 | -9.7223  | 4.3588 |
| H | 12.3285 | -11.0031 | 3.5799 |
| H | 10.2714 | -9.7132  | 3.0048 |

TABLE S11: xyz coordinates of the optimized structure of **B-(PP)<sub>10</sub>** obtained at B3LYP-D3/6-31G(d) level.

|     |         |         |         |
|-----|---------|---------|---------|
| 172 |         |         |         |
| N   | -4.1940 | 1.2354  | 1.4087  |
| C   | -4.5709 | 2.5178  | 1.2558  |
| C   | -5.1480 | 3.2514  | 2.3062  |
| C   | -5.3543 | 2.6086  | 3.5240  |
| C   | -4.9837 | 1.2750  | 3.6795  |
| C   | -4.3917 | 0.6188  | 2.5889  |
| H   | -5.4406 | 4.2854  | 2.1570  |
| H   | -5.8020 | 3.1484  | 4.3545  |
| H   | -5.1151 | 0.7591  | 4.6243  |
| C   | -3.9322 | -0.7625 | 2.6488  |
| C   | -2.8293 | -2.5578 | 1.8464  |
| C   | -3.4232 | -2.9337 | 3.0536  |
| C   | -4.1095 | -1.8076 | 3.5603  |
| H   | -4.6763 | -1.7548 | 4.4800  |
| H   | -3.3463 | -3.9067 | 3.5183  |
| N   | -3.1584 | -1.2512 | 1.6354  |
| H   | -2.8790 | -0.7209 | 0.8241  |
| C   | -2.0316 | -3.2582 | 0.8485  |
| N   | -1.5581 | -2.4901 | -0.1502 |
| C   | -1.8030 | -4.6408 | 0.8958  |
| C   | -0.8565 | -3.0586 | -1.1479 |
| C   | -1.0770 | -5.2247 | -0.1390 |
| H   | -2.2019 | -5.2346 | 1.7105  |
| C   | -0.5996 | -4.4386 | -1.1828 |
| C   | -0.3739 | -2.1424 | -2.1712 |
| H   | -0.8838 | -6.2939 | -0.1317 |
| H   | -0.0214 | -4.8672 | -1.9937 |



C 0.2609 -2.3108 -3.4037  
N -0.5325 -0.7979 -1.9898  
C 0.4613 -1.0286 -3.9596  
H 0.5442 -3.2555 -3.8448  
C -0.0405 -0.0932 -3.0527  
H -0.9907 -0.3812 -1.1938  
H 0.9528 -0.8000 -4.8947  
C -0.0973 1.3601 -3.0172  
N -0.4564 1.8786 -1.8280  
C 0.1799 2.1723 -4.1256  
C -0.5648 3.2105 -1.6865  
C 0.0601 3.5523 -3.9765  
H 0.4633 1.7291 -5.0730  
C -0.3232 4.0921 -2.7523  
C -0.9213 3.6494 -0.3460  
H 0.2667 4.2074 -4.8185  
H -0.4047 5.1632 -2.6049  
C -1.2806 4.8738 0.2201  
N -0.9527 2.7248 0.6592  
C -1.5400 4.6498 1.5895  
H -1.3630 5.8122 -0.3095  
C -1.3226 3.2919 1.8421  
H -0.7361 1.7465 0.5415  
H -1.8424 5.3883 2.3192  
C -1.4024 2.4616 3.0325  
N -0.9394 1.2011 2.8966  
C -1.9389 2.9389 4.2376  
C -0.9903 0.3702 3.9519  
C -1.9961 2.0721 5.3240  
H -2.3206 3.9516 4.3022

C -1.5169 0.7741 5.1941  
C -0.4607 -0.9721 3.7651  
H -2.4129 2.4082 6.2701  
H -1.5380 0.0840 6.0301  
C -0.5277 -2.0976 4.5872  
N 0.2468 -1.3335 2.6478  
C 0.1564 -3.1399 3.9397  
H -1.0461 -2.1569 5.5336  
C 0.6437 -2.6409 2.7283  
H 0.4794 -0.7114 1.8878  
H 0.2888 -4.1467 4.3099  
C 1.4356 -3.2927 1.6945  
N 1.8628 -2.5478 0.6542  
C 1.7295 -4.6642 1.8089  
C 2.5980 -3.1482 -0.3051  
C 2.4816 -5.2736 0.8145  
H 1.3606 -5.2339 2.6537  
C 2.9243 -4.5156 -0.2606  
C 3.0739 -2.3322 -1.4134  
H 2.7219 -6.3318 0.8773  
H 3.5255 -4.9609 -1.0444  
C 3.8029 -2.6878 -2.5511  
N 2.8642 -0.9809 -1.4793  
C 4.0112 -1.5219 -3.3084  
H 4.1556 -3.6801 -2.7938  
C 3.4139 -0.4637 -2.6246  
H 2.3184 -0.4593 -0.8093  
H 4.5811 -1.4371 -4.2226  
C 3.3784 0.9555 -2.9353  
N 3.0702 1.7942 -1.9289

C 3.6882 1.4232 -4.2264  
C 3.0586 3.1252 -2.1622  
C 3.7044 2.7945 -4.4516  
H 3.9146 0.7205 -5.0204  
C 3.3889 3.6677 -3.4139  
C 2.7031 3.9576 -1.0237  
H 3.9551 3.1835 -5.4351  
H 3.3920 4.7425 -3.5599  
C 2.4926 5.3288 -0.8468  
N 2.5050 3.3698 0.1909  
C 2.1567 5.5366 0.5099  
H 2.5691 6.0856 -1.6157  
C 2.1760 4.2919 1.1422  
H 2.5599 2.3770 0.3636  
H 1.9353 6.4827 0.9843  
C 1.9685 3.8217 2.5067  
N 2.3462 2.5480 2.7054  
C 1.4111 4.5988 3.5327  
C 2.1936 1.9821 3.9154  
C 1.2396 4.0059 4.7826  
H 1.0929 5.6173 3.3395  
C 1.6319 2.6856 4.9925  
C 2.6923 0.6179 4.0059  
H 0.7947 4.5732 5.5955  
H 1.5104 2.2077 5.9583  
C 2.5989 -0.3973 4.9593  
N 3.4314 0.1198 2.9672  
C 3.3023 -1.5150 4.4601  
H 2.0452 -0.3447 5.8860  
C 3.8258 -1.1629 3.2130

H 3.7018 0.6481 2.1512  
H 3.4095 -2.4754 4.9440  
C 4.6796 -1.8458 2.2495  
N 5.1026 -1.0948 1.2115  
C 5.0531 -3.1882 2.4062  
C 5.9322 -1.6394 0.3022  
C 5.8913 -3.7539 1.4489  
H 4.6769 -3.7688 3.2410  
C 6.3458 -2.9823 0.3860  
C 6.3914 -0.7673 -0.7698  
H 6.1856 -4.7970 1.5307  
H 6.9953 -3.4022 -0.3743  
C 7.3523 -0.9383 -1.7615  
N 5.8741 0.4986 -0.9297  
C 7.3926 0.2499 -2.5328  
H 7.9682 -1.8167 -1.8982  
C 6.4558 1.1179 -1.9970  
H 5.0793 0.8392 -0.4085  
H 8.0371 0.4540 -3.3773  
H 6.1476 2.1078 -2.3003  
C -4.3793 3.0612 -0.0823  
N -3.9849 2.2228 -1.0857  
C -4.5360 4.3271 -0.6519  
C -3.8814 2.8861 -2.2734  
H -3.8035 1.2372 -0.9665  
C -4.2170 4.2196 -2.0231  
H -4.8260 5.2255 -0.1248  
C -3.5146 2.1409 -3.4704  
H -4.2397 5.0146 -2.7560  
N -3.4794 0.8029 -3.3201

C -3.2161 2.7608 -4.6931  
C -3.1507 0.0263 -4.3674  
C -2.8558 1.9541 -5.7697  
H -3.2395 3.8415 -4.7805  
C -3.2173 -1.4087 -4.1285  
C -2.8145 0.5714 -5.6190  
H -2.6052 2.4046 -6.7267  
N -3.7309 -1.8788 -2.9523  
C -2.8885 -2.5241 -4.9028  
H -2.5505 -0.0779 -6.4469  
C -3.7550 -3.2440 -2.9386  
H -4.0699 -1.3028 -2.1946  
C -3.2208 -3.6736 -4.1567  
H -2.4408 -2.4996 -5.8866  
C -4.3115 -3.9402 -1.7881  
H -3.0936 -4.7023 -4.4654  
N -4.8257 -3.1480 -0.8216  
C -4.3177 -5.3419 -1.6873  
C -5.3500 -3.7283 0.2593  
C -4.8738 -5.9282 -0.5567  
H -3.8860 -5.9472 -2.4779  
C -5.4027 -5.1113 0.4450  
H -5.7305 -3.0528 1.0223  
H -4.8885 -7.0103 -0.4538  
H -5.8388 -5.5282 1.3474

TABLE S12: xyz coordinates of the optimized structure of **A**-(PT)<sub>10</sub> obtained at B3LYP-D3/6-31G(d) level.

162

|   |         |         |         |
|---|---------|---------|---------|
| C | -3.3720 | -5.1948 | -1.8445 |
| C | -4.6566 | -5.6620 | -2.0077 |
| S | -4.6450 | -7.3961 | -2.2615 |
| C | -2.9177 | -7.4538 | -2.1456 |
| C | -2.3836 | -6.2135 | -1.9197 |
| C | -5.8896 | -4.8678 | -1.9663 |
| N | -5.7169 | -3.5390 | -1.8932 |
| C | -6.7893 | -2.7313 | -1.8514 |
| C | -8.1029 | -3.2332 | -1.8807 |
| C | -8.2815 | -4.6109 | -1.9586 |
| C | -7.1719 | -5.4486 | -1.9984 |
| C | -6.4842 | -1.3001 | -1.7673 |
| S | -7.7009 | -0.0461 | -1.8654 |
| C | -6.5050 | 1.2117  | -1.6519 |
| C | -5.2471 | 0.6630  | -1.5161 |
| C | -5.2351 | -0.7465 | -1.5840 |
| C | -6.8241 | 2.6419  | -1.6130 |
| N | -5.7585 | 3.4480  | -1.4991 |
| C | -5.9267 | 4.7776  | -1.4459 |
| C | -7.2017 | 5.3681  | -1.5114 |
| C | -8.3085 | 4.5323  | -1.6360 |
| C | -8.1337 | 3.1522  | -1.6841 |
| C | -4.6836 | 5.5390  | -1.2916 |
| S | -4.5918 | 7.2858  | -1.3075 |
| C | -2.8703 | 7.2526  | -0.9982 |
| C | -2.4205 | 5.9521  | -0.9073 |
| C | -3.4378 | 4.9909  | -1.0727 |

|   |         |         |         |
|---|---------|---------|---------|
| C | -2.0415 | 8.4476  | -0.8161 |
| N | -0.7246 | 8.2026  | -0.7406 |
| C | 0.1384  | 9.2116  | -0.5469 |
| C | -0.2958 | 10.5432 | -0.4226 |
| C | -1.6633 | 10.7996 | -0.4982 |
| C | -2.5588 | 9.7510  | -0.6936 |
| C | 1.5448  | 8.7946  | -0.4839 |
| S | 2.8852  | 9.8692  | -0.1313 |
| C | 4.0415  | 8.5558  | -0.2521 |
| C | 3.3969  | 7.3740  | -0.5483 |
| C | 1.9989  | 7.5077  | -0.6788 |
| C | 5.4883  | 8.7018  | -0.0502 |
| N | 6.1673  | 7.5446  | -0.0697 |
| C | 7.4980  | 7.5427  | 0.1004  |
| C | 8.2197  | 8.7328  | 0.3024  |
| C | 7.5165  | 9.9350  | 0.3201  |
| C | 6.1350  | 9.9356  | 0.1424  |
| C | 8.1093  | 6.2080  | 0.0676  |
| S | 9.8344  | 5.9075  | 0.1602  |
| C | 9.5944  | 4.1734  | 0.0545  |
| C | 8.2514  | 3.8796  | -0.0441 |
| C | 7.4196  | 5.0192  | -0.0381 |
| C | 10.6810 | 3.1863  | 0.0691  |
| N | 10.2708 | 1.9089  | 0.0369  |
| C | 11.1717 | 0.9145  | 0.0399  |
| C | 12.5546 | 1.1683  | 0.0778  |
| C | 12.9812 | 2.4935  | 0.1108  |
| C | 12.0455 | 3.5249  | 0.1064  |
| C | 10.5891 | -0.4329 | 0.0070  |
| S | 11.5294 | -1.9110 | -0.0661 |

|   |         |          |         |
|---|---------|----------|---------|
| C | 10.0808 | -2.8991  | -0.0657 |
| C | 8.9567  | -2.1033  | -0.0107 |
| C | 9.2415  | -0.7217  | 0.0288  |
| C | 10.0845 | -4.3663  | -0.1182 |
| N | 8.8688  | -4.9291  | -0.0371 |
| C | 8.7441  | -6.2646  | -0.0806 |
| C | 9.8614  | -7.1091  | -0.2091 |
| C | 11.1230 | -6.5259  | -0.2943 |
| C | 11.2516 | -5.1401  | -0.2503 |
| C | 7.3626  | -6.7503  | 0.0243  |
| S | 6.9009  | -8.4378  | -0.0937 |
| C | 5.2063  | -8.0482  | 0.1331  |
| C | 5.0429  | -6.6884  | 0.2885  |
| C | 6.2506  | -5.9611  | 0.2262  |
| C | 4.1264  | -9.0428  | 0.1490  |
| N | 2.9098  | -8.5373  | 0.4047  |
| C | 1.8402  | -9.3473  | 0.4376  |
| C | 1.9518  | -10.7311 | 0.2118  |
| C | 3.2136  | -11.2559 | -0.0558 |
| C | 4.3227  | -10.4145 | -0.0918 |
| C | 0.5729  | -8.6675  | 0.7307  |
| S | -1.0017 | -9.4395  | 0.6587  |
| C | -1.8125 | -7.9545  | 1.1144  |
| C | -0.8962 | -6.9431  | 1.3010  |
| C | 0.4409  | -7.3430  | 1.0881  |
| C | -3.2699 | -7.8045  | 1.2025  |
| N | -3.6841 | -6.5336  | 1.2995  |
| C | -4.9955 | -6.2584  | 1.3538  |
| C | -5.9663 | -7.2765  | 1.3213  |
| C | -5.5354 | -8.5977  | 1.2431  |



|   |         |          |         |
|---|---------|----------|---------|
| C | -4.1733 | -8.8810  | 1.1815  |
| H | -3.8200 | -9.9059  | 1.1218  |
| H | -6.2608 | -9.4064  | 1.2231  |
| H | -7.0250 | -7.0388  | 1.3516  |
| C | -5.3126 | -4.8296  | 1.4234  |
| H | -1.2083 | -5.9443  | 1.5762  |
| H | 1.3031  | -6.6968  | 1.1894  |
| H | 5.3112  | -10.8095 | -0.3047 |
| H | 3.3329  | -12.3208 | -0.2353 |
| H | 1.0796  | -11.3762 | 0.2527  |
| H | 4.0649  | -6.2505  | 0.4395  |
| H | 6.3309  | -4.8865  | 0.3251  |
| H | 12.2284 | -4.6717  | -0.3208 |
| H | 12.0058 | -7.1512  | -0.3950 |
| H | 9.7467  | -8.1883  | -0.2371 |
| H | 7.9622  | -2.5299  | -0.0025 |
| H | 8.4964  | 0.0618   | 0.0736  |
| H | 12.3640 | 4.5625   | 0.1274  |
| H | 14.0429 | 2.7225   | 0.1399  |
| H | 13.2730 | 0.3545   | 0.0846  |
| H | 7.9003  | 2.8588   | -0.1188 |
| H | 6.3399  | 4.9965   | -0.1052 |
| H | 5.5751  | 10.8657  | 0.1471  |
| H | 8.0453  | 10.8718  | 0.4725  |
| H | 9.2955  | 8.7173   | 0.4466  |
| H | 3.9424  | 6.4469   | -0.6650 |
| H | 1.3191  | 6.6984   | -0.9105 |
| H | -3.6281 | 9.9318   | -0.7377 |
| H | -2.0309 | 11.8177  | -0.4023 |
| H | 0.4134  | 11.3518  | -0.2748 |

|   |          |         |         |
|---|----------|---------|---------|
| H | -1.3826  | 5.7256  | -0.7021 |
| H | -3.2961  | 3.9202  | -1.0131 |
| H | -8.9876  | 2.4873  | -1.7685 |
| H | -9.3078  | 4.9561  | -1.6859 |
| H | -7.3209  | 6.4454  | -1.4530 |
| H | -4.3750  | 1.2844  | -1.3621 |
| H | -4.3532  | -1.3662 | -1.4901 |
| H | -7.2939  | -6.5259 | -2.0480 |
| H | -9.2834  | -5.0312 | -1.9793 |
| H | -8.9562  | -2.5642 | -1.8339 |
| H | -3.1712  | -4.1472 | -1.6613 |
| H | -1.3216  | -6.0420 | -1.7871 |
| H | -2.3991  | -8.3999 | -2.2238 |
| S | -6.9375  | -4.1946 | 1.5433  |
| C | -6.3551  | -2.5448 | 1.5231  |
| C | -4.9798  | -2.5191 | 1.4334  |
| C | -4.3947  | -3.8012 | 1.3740  |
| H | -3.3348  | -3.9958 | 1.2796  |
| H | -4.4358  | -1.5850 | 1.3924  |
| C | -7.2322  | -1.3712 | 1.5601  |
| N | -6.5945  | -0.1941 | 1.6587  |
| C | -7.3013  | 0.9463  | 1.6776  |
| C | -8.7069  | 0.9496  | 1.6009  |
| C | -9.3677  | -0.2712 | 1.5065  |
| C | -8.6344  | -1.4536 | 1.4804  |
| C | -6.5008  | 2.1701  | 1.7811  |
| H | -9.2639  | 1.8811  | 1.6115  |
| H | -10.4521 | -0.3004 | 1.4437  |
| H | -9.1315  | -2.4141 | 1.3892  |
| S | -7.2015  | 3.7692  | 1.8810  |

|   |         |        |        |
|---|---------|--------|--------|
| C | -5.6233 | 4.5220 | 1.9437 |
| C | -4.6307 | 3.5662 | 1.8925 |
| C | -5.1238 | 2.2458 | 1.7989 |
| H | -4.5095 | 1.3573 | 1.7345 |
| H | -3.5842 | 3.8417 | 1.9062 |
| C | -5.4278 | 5.9727 | 2.0042 |
| N | -4.1466 | 6.3782 | 2.1295 |
| C | -3.8989 | 7.6866 | 2.1685 |
| C | -4.8893 | 8.6703 | 2.1004 |
| C | -6.2136 | 8.2525 | 1.9748 |
| C | -6.4911 | 6.8904 | 1.9194 |
| H | -2.8505 | 7.9675 | 2.2505 |
| H | -4.6236 | 9.7221 | 2.1388 |
| H | -7.0215 | 8.9768 | 1.9132 |
| H | -7.5133 | 6.5421 | 1.8055 |

TABLE S13: xyz coordinates of the optimized structure of **B-(PT)<sub>10</sub>** obtained at B3LYP-D3/6-31G(d) level.

|     |         |         |         |
|-----|---------|---------|---------|
| 162 |         |         |         |
| N   | -0.9717 | 3.5900  | 1.5549  |
| C   | -0.0873 | 4.2517  | 2.3166  |
| C   | -0.0714 | 5.6563  | 2.3757  |
| C   | -0.9997 | 6.3581  | 1.6093  |
| C   | -1.9085 | 5.6680  | 0.8126  |
| C   | -1.8649 | 4.2620  | 0.8143  |
| H   | 0.6372  | 6.1769  | 3.0111  |
| H   | -1.0120 | 7.4449  | 1.6316  |
| H   | -2.6263 | 6.1981  | 0.1965  |
| C   | -2.7749 | 3.4336  | 0.0273  |
| S   | -2.4986 | 1.7178  | -0.0388 |
| C   | -3.9045 | 1.4941  | -1.0390 |
| C   | -4.5423 | 2.6924  | -1.2970 |
| C   | -3.8964 | 3.7974  | -0.6934 |
| H   | -4.2584 | 4.8167  | -0.7670 |
| H   | -5.4349 | 2.7794  | -1.9064 |
| C   | -4.2523 | 0.1375  | -1.4554 |
| C   | -5.4412 | -0.1834 | -2.1333 |
| C   | -5.6864 | -1.5204 | -2.4362 |
| C   | -4.7613 | -2.4975 | -2.0787 |
| C   | -3.5853 | -2.0921 | -1.4222 |
| N   | -3.3590 | -0.8055 | -1.1229 |
| H   | -6.1574 | 0.5887  | -2.3929 |
| H   | -6.6019 | -1.8015 | -2.9510 |
| H   | -4.9331 | -3.5424 | -2.3133 |
| C   | -0.3761 | -3.9565 | -0.2014 |
| C   | -1.2523 | -4.9294 | -0.6426 |

C -2.4727 -4.3941 -1.1187  
C -2.5231 -3.0163 -1.0318  
S -1.0542 -2.3617 -0.3641  
H -1.0243 -5.9893 -0.6402  
H -3.2861 -5.0028 -1.4974  
C 0.8357 3.4093 3.0764  
C 1.9700 3.7586 3.7833  
S 0.5568 1.6896 3.1194  
C 2.6254 2.6422 4.3559  
H 2.3423 4.7742 3.8559  
C 1.9848 1.4470 4.0904  
H 3.5414 2.7180 4.9320  
C 2.3588 0.0832 4.4642  
C 3.5685 -0.2364 5.1070  
N 1.4739 -0.8661 4.1289  
C 3.8357 -1.5740 5.3846  
H 4.2821 0.5387 5.3640  
C 1.7305 -2.1570 4.3894  
C 2.9187 -2.5585 5.0235  
H 4.7636 -1.8507 5.8787  
C 0.6849 -3.0903 3.9736  
H 3.1088 -3.6054 5.2345  
S -0.8122 -2.4330 3.3729  
C 0.6786 -4.4714 3.9552  
C -1.4434 -4.0331 3.0946  
C -0.5314 -5.0077 3.4509  
H 1.5223 -5.0801 4.2603  
C -2.7791 -4.1562 2.5133  
H -0.7168 -6.0715 3.3462  
N -3.4361 -2.9978 2.3588

C -3.3464 -5.3802 2.1179  
C -4.6571 -2.9764 1.8057  
C -4.6165 -5.3636 1.5471  
H -2.8016 -6.3100 2.2406  
C -5.2904 -4.1564 1.3771  
H -5.0806 -6.2937 1.2291  
H -6.2808 -4.1261 0.9359  
C -5.2623 -1.6507 1.6965  
C -6.4313 -1.2577 1.0756  
S -4.4293 -0.2957 2.4114  
C -6.6608 0.1357 1.1703  
H -7.0863 -1.9377 0.5427  
C -5.6694 0.8009 1.8672  
H -7.5178 0.6297 0.7253  
C -5.5248 2.2293 2.1465  
C -6.4574 3.1846 1.7030  
N -4.4263 2.5817 2.8443  
C -6.2311 4.5269 1.9866  
H -7.3339 2.8790 1.1413  
C -4.2194 3.8723 3.1021  
C -5.0853 4.8898 2.6965  
H -6.9376 5.2818 1.6508  
H -4.8628 5.9269 2.9275  
H -3.3075 4.1046 3.6486  
C 0.9641 -4.0945 0.3647  
N 1.6086 -2.9425 0.6005  
C 1.5468 -5.3383 0.6655  
C 2.8334 -2.9506 1.1466  
C 2.8138 -5.3508 1.2416  
H 1.0122 -6.2618 0.4716

C 3.4456 -1.6366 1.3300  
C 3.4742 -4.1523 1.4964  
H 3.2875 -6.2966 1.4932  
S 2.6303 -0.2356 0.6949  
C 4.6353 -1.2970 1.9448  
H 4.4666 -4.1441 1.9338  
C 3.8997 0.8078 1.2700  
C 4.8916 0.0942 1.9145  
H 5.2959 -2.0170 2.4142  
C 3.7895 2.2460 1.0358  
H 5.7813 0.5486 2.3355  
N 2.7693 2.6233 0.2527  
C 4.6726 3.1867 1.5951  
C 2.5629 3.9209 -0.0144  
C 4.4544 4.5356 1.3302  
H 5.4907 2.8674 2.2316  
C 1.4413 4.1971 -0.9106  
C 3.3893 4.9232 0.5213  
H 5.1163 5.2870 1.7538  
S 0.6105 2.8491 -1.6334  
C 0.9047 5.4032 -1.3187  
H 3.2129 5.9686 0.2924  
C -0.4675 3.9209 -2.4839  
C -0.1838 5.2461 -2.2114  
H 1.2650 6.3668 -0.9761  
C -1.5161 3.3374 -3.3203  
H -0.7368 6.0785 -2.6338  
N -1.4352 2.0103 -3.4955  
C -2.5586 4.0912 -3.8882  
C -2.3660 1.3633 -4.2127

C -3.5201 3.4247 -4.6429  
H -2.6207 5.1619 -3.7261  
C -2.1708 -0.0812 -4.3270  
C -3.4396 2.0446 -4.8122  
H -4.3376 3.9811 -5.0945  
S -0.6804 -0.7701 -3.7431  
C -3.0181 -1.0509 -4.8262  
H -4.1769 1.5089 -5.4003  
C -1.2092 -2.3730 -4.1792  
C -2.4727 -2.3542 -4.7378  
H -4.0106 -0.8415 -5.2089  
C -0.3316 -3.5062 -3.8896  
H -2.9995 -3.2450 -5.0626  
N 0.8735 -3.1877 -3.3944  
C -0.7139 -4.8449 -4.0884  
C 1.7444 -4.1517 -3.0599  
C 0.1906 -5.8474 -3.7505  
H -1.6947 -5.0893 -4.4812  
C 1.4356 -5.5134 -3.2237  
C 3.0206 -3.6824 -2.5233  
H -0.0775 -6.8913 -3.8924  
H 2.1534 -6.2814 -2.9568  
S 3.3528 -1.9716 -2.5290  
C 4.0575 -4.3987 -1.9584  
C 4.8954 -2.2315 -1.7602  
C 5.1213 -3.5735 -1.5217  
H 4.0439 -5.4752 -1.8307  
C 5.7263 -1.0732 -1.4335  
H 6.0156 -3.9564 -1.0421  
C 6.9114 -1.1700 -0.6830



|   |        |         |         |
|---|--------|---------|---------|
| N | 5.2731 | 0.1068  | -1.8829 |
| C | 7.6150 | -0.0013 | -0.4073 |
| H | 7.2592 | -2.1294 | -0.3161 |
| C | 5.9457 | 1.2357  | -1.6132 |
| C | 7.1373 | 1.2231  | -0.8666 |
| H | 8.5344 | -0.0439 | 0.1711  |
| C | 5.3593 | 2.4633  | -2.1481 |
| H | 7.6742 | 2.1433  | -0.6633 |
| C | 5.7295 | 3.7770  | -1.9581 |
| S | 3.9462 | 2.3535  | -3.1707 |
| C | 4.8815 | 4.6984  | -2.6328 |
| H | 6.5635 | 4.0766  | -1.3333 |
| C | 3.8788 | 4.0729  | -3.3292 |
| H | 5.0033 | 5.7754  | -2.5889 |
| H | 3.0824 | 4.5320  | -3.9002 |
